# Supplementary material for: Level of phosphohistone H3 among various types of human cancers
Source: PubMed Central journal article supplement — BMJ Open. 2012 Oct 11;2(5):e001071. doi: 10.1136/bmjopen-2012-001071 (PMC3488750; doi:10.1136/bmjopen-2012-001071), 2012-10-11

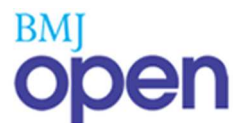

### Level of phosphohistone H3 among various types of human cancers

|                                 |                                                                                                                                                                                                                                                      |
|---------------------------------|------------------------------------------------------------------------------------------------------------------------------------------------------------------------------------------------------------------------------------------------------|
| Journal:                        | <i>BMJ Open</i>                                                                                                                                                                                                                                      |
| Manuscript ID:                  | bmjopen-2012-001071                                                                                                                                                                                                                                  |
| Article Type:                   | Research                                                                                                                                                                                                                                             |
| Date Submitted by the Author:   | 27-Feb-2012                                                                                                                                                                                                                                          |
| Complete List of Authors:       | Sun, Amy; Merck Sharp & Dohme Corp., Zhou, Wei; Merck Sharp & Dohme Corp., Lunceford, Jared; Merck Sharp & Dohme Corp., Strack, Peter; Merck Sharp & Dohme Corp., Dauffenbach, Lisa; Mosaic Laboratories, Kerfoot, Christopher; Mosaic Laboratories, |
| <b>Primary Subject Heading</b>: | Diabetes and endocrinology                                                                                                                                                                                                                           |
| Secondary Subject Heading:      | Dentistry and oral medicine                                                                                                                                                                                                                          |
| Keywords:                       | ANAESTHETICS, Adult intensive & critical care < ANAESTHETICS, Anaesthesia in obstetrics < ANAESTHETICS                                                                                                                                               |
|                                 |                                                                                                                                                                                                                                                      |

SCHOLARONE™  
Manuscripts

# Level of phosphohistone H3 among various types of human cancers

Amy Sun<sup>1\*</sup>, Wei Zhou<sup>1</sup>, Jared Lunceford<sup>1</sup>, Peter Strack<sup>1</sup>, Lisa M. Dauffenbach<sup>2</sup>,  
Christopher A. Kerfoot<sup>2</sup>

<sup>1</sup>Merck Sharp & Dohme Corp., One Merck Drive, Whitehouse Station, NJ 08889, United States; <sup>2</sup>Mosaic Laboratories, LLC, 12 Spectrum Pointe Drive, Lake Forest, CA 92630, United States

\*Correspondence to Dr. Amy Sun, 351 N. Sumneytown Pike, PO Box 1000, North Wales, PA 19454-1099, United States E-mail: [amy.sun@merck.com](mailto:amy.sun@merck.com); Telephone: 267 - 305-1350; Fax: 267 -305-6529

**Running title:** Phosphohistone H3 level in human cancers

**Keywords:** phospho-Histone H3, pHH3, immunohistochemistry, cancer

**Word Count:** 1590 words

## Author contributions:

AS conceived, designed or planned the study; AS, LD, and CK collected or assembled data and performed or supervised analyses. AS, WZ, JL, PS, LD, and CK interpreted results. AS, WZ, JL, and LD wrote sections of initial draft; AS, WZ, JL, PS, LD, and CK provided substantive suggestions for revision or critically reviewed subsequent iterations of manuscript. All authors reviewed and approved final version of the manuscript.

## Abstract

**Aims** Immunohistochemistry to assess the mitotic index marker phosphorylated histone H3 (pHH3) is often implemented for monitoring drug-mediated mitotic changes in clinical trials; however, data on the expression level of pHH3 (Ser10) and pHH3 (Ser28) among different cancers are limited.

**Methods** Using immunohistochemistry, pHH3 levels were measured using both pHH3 (Ser10) and (Ser28) antibodies among 10 human melanoma and 10 ovarian tumor samples. The samples were reviewed blindly by two reviewers. Ser10 was then selected to measure the pHH3 levels in cancers of breast, colorectal, esophageal, gastric, head and neck, and lung ( $n=5$  for each cancer).

**Results** The pHH3 (Ser10) expression was higher than pHH3 (Ser28) in both melanoma and ovarian cancers ( $p<0.01$ ), with the mean (standard deviation, SD) levels of 1.28% (0.47%) for Ser10 and 0.53% (0.44%) for Ser28 among melanoma, and 3.47% (3.51%) for Ser10 and 0.62% (0.68%) for Ser28 among ovarian cancers, respectively. No statistically significant differences were observed among different cancer types tested for pHH3 using Ser10 ( $p=0.197$ ). No reviewer effect was identified.

**Conclusions** The pHH3 Ser10 was significantly higher than Ser28 and may serve as the more robust of two pHH3 assays for measuring mitotic index.

**What this paper adds:** H3 (pHH3) is often implemented for monitoring drug-mediated mitotic changes in clinical trials; however, data on the expression level among different cancers are limited. By comparing the performance of two antibodies pHH3 (Ser10) and pHH3 (Ser28) in the same laboratory and in various cancer specimens, the pHH3 Ser10 was shown to be significantly higher than Ser28 and may serve as the more robust of two pHH3 assays for measuring mitotic index.

## Introduction

Microscopic evaluation of mitotic activity is a routine procedure in assessing the grade of malignancy in tumors such as soft tissue sarcoma and breast adenocarcinoma.[1] Histone H3 is a core histone protein, which together with the other histones forms the major protein constituents of chromatin in eukaryotic cells. Anti-phosphorylated histone H3 (pHH3) antibodies specifically detect the core protein histone H3 only when phosphorylated at serine 10 (Ser10) or serine 28 (Ser28). Immunohistochemistry (IHC) for pHH3 has been used for mitotic cell counting in different types of tumors as marker of cells in late G2 and M Part. Multiple studies have demonstrated strong correlation between pHH3-based IHC and standard mitotic counts performed on samples stained with hematoxylin and eosin (H&E).[1, 2] Comparisons between pre- and post-treatment pHH3 levels are often used to evaluate the effectiveness of mitotic inhibitors in pre-clinical *in vitro* studies and clinical trials.

There is only limited information on the expression level of pHH3 among different types of cancers including breast,[1, 3, 4] ovarian,[5] colorectal,[6] squamous cell carcinoma of the larynx,[7] intracerebral gliomas (primary intracerebral astrocytoma),[8, 9] meningioma,[2, 10] and granular cell tumors (GCTs).[11] Different phosphorylation sites (i.e. Ser10, Ser28), different antibodies and measurement units (i.e. mitotic index, label index, labeling fraction) were used in these studies in different labs, and there were large variations in the pHH3 levels across studies and cancer types. To our knowledge, this study was the first study to investigate the expression levels of pHH3 across different types of cancers, using uniform techniques and assay platforms in a single laboratory.

## Materials and methods

### Study design

This study was conducted in two Parts. The purpose of Part I was to perform IHC using pHH3 (Ser10) and pHH3 (Ser28) in formalin-fixed, paraffin-embedded (FFPE) human melanoma and ovarian cancer (10 samples in each cancer type) to evaluate which antibody corresponded to higher expression levels. The purpose of Part II was to perform IHC using the antibody that demonstrated higher expression levels in Part I, in human cancers of breast, colorectal, esophageal, gastric, esophageal, non-small cell lung samples (NSCLC) and head & neck, and (5 in each type). A second evaluation of the percent positive staining of pHH3 (Ser10) and pHH3 (Ser28) in human melanoma and ovarian cancer were performed blindly to assess the levels of pHH3 from two independent readers.

FFPE human cancers were provided by Mosaic Laboratories tissue bank, and were procured under an Institutional Review Board reviewed protocol.

pHH3 Ser 10 (rabbit IgG, polyclonal) antibodies were purchased from Upstate (Billerica, CA), and pHH3 Ser 28 (rabbit IgG, Clone E191) were purchased from Epitomics (Burlingame, CA).

### Immunohistochemistry

Immunohistochemistry was performed in accordance with Mosaic Laboratories' validated protocols. Briefly, 4 micron tissue slides were deparaffinized with xylene and ethanol. Antigen retrieval was performed using High Tide Buffer (Mosaic Laboratories)

1  
2  
3 for 40 minutes in a 95°C waterbath. Samples were blocked with Sniper (Biocare  
4  
5 Medical) for 5 minutes followed by incubation with diluted pHH3 (Ser28) or pHH3  
6  
7 (Ser10) antibody for 30 minutes. The primary antibody was detected with Envision+  
8  
9 Rabbit HRP/DAB detection kit (Dako). Hematoxylin was used for counterstaining.  
10  
11 Enumeration was performed by manual review of approximately 600-1000 cells per  
12  
13 image, where possible.  
14  
15  
16  
17  
18  
19  
20  
21  
22  
23  
24  
25  
26  
27  
28  
29  
30  
31  
32  
33  
34  
35  
36  
37  
38  
39  
40  
41  
42  
43  
44  
45  
46  
47  
48  
49  
50  
51  
52  
53  
54  
55  
56  
57  
58  
59  
60

## Data analysis

Tests and descriptive statistics (means and standard deviations) were computed by tumor type. Because the data clearly were not normally distributed, with many low measurements and a few outlying high measurements, nonparametric tests were used for comparisons resulting in  $p$ -values. For the analysis of the Part I data, Wilcoxon's Signed Rank Test was used to compare the pHH3 expression levels as measured by the two different approaches, tested within both tumor types. The Spearman correlation (correlation of the ranks) between Ser10 and Ser28 was calculated for the combined ovarian and melanoma samples. Wilcoxon's Rank Sum Test was used to compare pHH3 levels between tumor types in Part I. For Part II tests, the Kruskal-Wallis test, a nonparametric alternative to ANOVA (analysis of variance) was used to compare the pHH3 levels between different types of cancers.

For variability assessment between two evaluators, a variance components analysis of log (% Ser10) and log (% Ser28) data was conducted. The mixed model included an intercept term, a fixed effect for reviewer, a random effect for the particular stained sample that was repeatedly measured, and a random residual error term. The latter two terms allow us to decompose the overall variance as a sum of variance from sample-to-sample and variance due to repeated review of the sample.

## Results

Demographic, clinical, and pHH3 staining information on different types of cancer were summarized in Table 1. IHC staining of two ovarian cancer samples is shown for each antibody in Figure 1. In Part I melanoma samples, the percentage of cells that were pHH3 (Ser10)-positive was statistically significantly higher than pHH3 (Ser28) ( $p=0.0039$ ), with mean pHH3 of 1.28% (SD, 0.47; range 0.73-2.13) for Ser10 and 0.53% (SD, 0.44; range 0.14-1.69) for Ser28. In Part I ovarian cancer samples, mean pHH3 was also significantly higher for Ser10 than Ser28 ( $p=0.0020$ ) with a mean of 3.47% (SD, 3.51; range 0.60-11.70) for Ser10 and 0.62% (SD, 0.68; range 0-2.30) for Ser28. The Spearman correlation of Ser10 with Ser28 ( $N=20$ , using both tumor types) was positive 0.30 but not statistically significant ( $p=0.1966$ ), indicating that these two measures do not track each other within a sample in a robust fashion. Comparing pHH3 levels between ovarian and melanoma tumor samples, there was some evidence of a significant difference as measured by Ser10 ( $p=0.0638$ ), but not Ser28 ( $p=1.000$ ). Based on the above results, Ser10 was selected as the antibody for assaying pHH3 in Part II.

In Part II, mean pHH3 Ser10 expression was highest in colorectal cancer (3.73%, SD 2.45%), followed by head & neck cancer (3.00%, SD 2.33%), gastric cancer (2.74%, SD 1.62%), esophageal cancer (2.36%, SD 1.08%), breast cancer (1.80%, SD 0.35%), NSCLC (1.42%, SD 0.88%). The differences in these six tumor types assessed in Part II were not found to be statistically significant at these limited group sizes via nonparametric testing ( $p=0.1969$ ).

Manual enumeration performed by two independent reviewers of the percent positive staining observed in melanoma and ovarian cancer samples is summarized in



1  
2  
3 Table 2. The percent positive staining was performed on approximately 1000 tumor cells  
4 per image, which was consistent for each reviewer.  
5  
6  
7

8 No significant difference was found between results generated by independent  
9 reviewers. Table 2 provides results for breakdown of the overall variance. With the  
10 exception of Ser10 in Melanoma, results indicate the variability from sample-to-sample is  
11 the dominant source of variation, and that multiple reviews of the same stained sample is  
12 a relatively minor component of the overall variability.  
13  
14  
15  
16  
17  
18  
19  
20  
21  
22  
23  
24  
25  
26  
27  
28  
29  
30  
31  
32  
33  
34  
35  
36  
37  
38  
39  
40  
41  
42  
43  
44  
45  
46  
47  
48  
49  
50  
51  
52  
53  
54  
55  
56  
57  
58  
59  
60

## Discussion

Measurement of pHH3 levels can be used for quantifying mitosis and the effectiveness of mitotic inhibitors in early drug development. A number of previous studies have measured pHH3 levels among different types of cancers. Studies suggested that pHH3 index increased with higher grade of tumor, including cancers of breast, ovarian, melanoma, vulval intraepithelial neoplasia, and meningioma, and limited studies suggested no difference between different grade of tumor for colorectal cancer or squamous cell carcinoma of the larynx.[1-7, 10] The pHH3 levels have been shown to be a prognostic factor for different types of cancers. At the time this study was performed, there were no data comparing pHH3 levels between Ser10 and Ser28 and pHH3 levels across different types of cancers.

Using uniformed techniques, and assay platforms in a single laboratory, we assessed pHH3 (Ser 10 and Ser 28) expression levels. Our results suggested that these two antibodies do not correlate to each other within a sample in a robust fashion, and pHH3 values measured using Ser10 were significantly higher than those obtained via Ser28. The results were confirmed by a second, independent reviewer of the slides. Note, this observation was also noted in HeLa cells treated with Nocodazole (51.16% for Ser10 and 30.10% for Ser28), though data is not shown. Nocodazole is commonly used for synchronization studies and arrests the cells in M phase.

There are at least four possibilities for the divergent results. The first is that the phosphorylation sites are differentially regulated, and that not all mitotic cells will demonstrate pHH3 at both sites. The second possibility is that Ser10 is phosphorylated earlier or for a more prolonged period during mitosis than Ser28. Third, the pHH3

(Ser28) has been described as sensitive to delays in time to fixation;<sup>[12]</sup> however samples used for this study were controlled for fixation. Finally, the differences may be simply due to intrinsic antibody characteristics such as affinity and/or specificity. To address whether the decreased proportion of cells stained by pHH3 (Ser28) was because of inadequate sensitivity, we attempted to increase the sensitivity in specimens with divergent staining results. Increasing the pHH3 (Ser28) primary antibody concentration did not result in an increase in positive cells prior to appearance of non-specific staining (data not shown). This result supports the observation that phosphorylation of Ser28 is present only in a fraction of cells with Ser10 phosphorylation.

In Part II, no significant difference was observed among different tumor types ( $p=0.1969$  non-parametric testing), which may probably be due to the sample size ( $n=5$  for each). In addition, we could not perform subgroup analysis and check the variation of pHH3 levels by different demographic, pathology, and clinical characteristics. Further studies with larger sample sizes are needed to confirm the preliminary findings.

In conclusion, mitotic counts performed by evaluating cells that are positive by immunohistochemistry for pHH3 at Ser10 were much higher than at Ser28, and pHH3 (Ser10) should be used for evaluating the effectiveness of mitotic inhibitors.

### **Acknowledgements**

Authors would like to thank Ms. Sheila Erespe and Ms. Kim Della Penna of Merck for their valuable help in preparing this manuscript.

1  
2  
3 **Competing interests and Source of Funding:** AS, WZ, JL, and PS are employees of  
4 Merck Sharp & Dohme Corp. and may own stock/stock options at Merck. LD and CK  
5  
6 received a fee for work done from Merck.  
7  
8  
9

### 10 11 12 13 14 15 **Take-home messages**

- 16  
17 • H3 (pHH3) is often implemented for monitoring drug-mediated mitotic changes  
18 in clinical trials; however, data on the expression level among different cancers  
19 are limited.  
20  
21
- 22 • We, for the first time, compared in the same laboratory the performance of two  
23 antibodies pHH3 (Ser10) and pHH3 (Ser28), in various cancer specimen.  
24  
25
- 26 • The pHH3 Ser10 was significantly higher than Ser28 and may serve as the more  
27 robust of two pHH3 assays for measuring mitotic index.  
28  
29  
30  
31  
32  
33  
34  
35  
36  
37  
38  
39  
40  
41  
42  
43  
44  
45  
46  
47  
48  
49  
50  
51  
52  
53  
54  
55  
56  
57  
58  
59  
60

**Table 1** The pHH3 expression levels among different types of cancers.

| Tumor type | Sample size | Age (mean, SD) | Gender (male: female)   | Prior Therapy           | Stage                                | Grade                                | pHH3 (Ser10) percent positive* | pHH3 (Ser 28) percent positive* |
|------------|-------------|----------------|-------------------------|-------------------------|--------------------------------------|--------------------------------------|--------------------------------|---------------------------------|
| Melanoma   | 10          | 58.5 (14.1)    | M = 3<br>F = 7          | Y = 5<br>N = 4<br>U = 1 | II = 1<br>III = 6<br>IV = 1<br>U = 2 | G1 = 0<br>G2 = 0<br>G3 = 0<br>U = 10 | 1.28 (0.47);<br>0.73-<br>2.13  | 0.53 (0.44);<br>0.14-<br>1.69   |
| Ovarian    | 10          | 61.7 (7.3)     | M = 0<br>F = 10         | Y = 1<br>N = 0<br>U = 9 | II = 0<br>III = 4<br>IV = 2<br>U = 4 | G1 = 0<br>G2 = 1<br>G3 = 6<br>U = 3  | 3.47 (3.51);<br>0.60-<br>11.70 | 0.62 (0.68);<br>0.00-<br>2.30   |
| Colorectal | 5           | 60.4 (13.5)    | M = 3<br>F = 1<br>U = 1 | Y = 2<br>N = 0<br>U = 3 | II = 1<br>III = 0<br>IV = 4<br>U = 0 | G1 = 0<br>G2 = 1<br>G3 = 0<br>U = 4  | 3.73 (2.45)                    |                                 |
| Head/neck  | 5           | 55.4 (9.8)     | M = 5<br>F = 0          | Y = 0<br>N = 3<br>U = 2 | II = 0<br>III = 1<br>IV = 0<br>U = 4 | G1 = 0<br>G2 = 2<br>G3 = 1<br>U = 2  | 3.00 (2.33)                    |                                 |
| Gastric    | 5           | 61.6 (20.9)    | M = 4<br>F = 1          | Y = 2<br>N = 0<br>U = 3 | II = 0<br>III = 2<br>IV = 3<br>U = 0 | G1 = 0<br>G2 = 2<br>G3 = 3<br>U = 0  | 2.74 (1.62)                    |                                 |
| Esophageal | 5           | 63.6 (11.4)    | M = 4<br>F = 1          | Y = 1<br>N = 2<br>U = 2 | II = 1<br>III = 2                    | G1 = 1<br>G2 =                       | 2.36 (1.08)                    |                                 |

|        |   |                |                |                         |                                      |                                     |                |  |
|--------|---|----------------|----------------|-------------------------|--------------------------------------|-------------------------------------|----------------|--|
|        |   |                |                |                         | IV = 0<br>U = 2                      | 1<br>G3 = 0<br>U = 3                |                |  |
| Breast | 5 | 61.6<br>(20.6) | M = 0<br>F = 5 | Y = 1<br>N = 0<br>U = 4 | II = 0<br>III = 3<br>IV = 1<br>U = 1 | G1 = 0<br>G2 = 1<br>G3 = 4<br>U = 0 | 1.80<br>(0.35) |  |
| NSCLC  | 5 | 62.2<br>(8.2)  | M = 5<br>F = 0 | Y = 4<br>N = 1<br>U = 0 | II = 0<br>III = 0<br>IV = 1<br>U = 3 | G1 = 0<br>G2 = 0<br>G3 = 0<br>U = 5 | 1.42<br>(0.88) |  |

\* Data are presented as mean (SD), and range

**Table 2** Variance components for log percent positive staining for pHH3 (Ser10) and pHH3 (Ser28) in human melanoma and ovarian cancer.

| Tumor Type | Assay Type | Total Variability | Sample-to-Sample | Review-to-Review | % Total due to Review |
|------------|------------|-------------------|------------------|------------------|-----------------------|
| Melanoma   | Ser10      | 0.1156            | 0.0567           | 0.0589           | 51.0%                 |
|            | Ser28      | 0.5444            | 0.4909           | 0.0535           | 9.8%                  |
| Ovarian    | Ser10      | 0.7362            | 0.7243           | 0.0119           | 1.6%                  |
|            | Ser28      | 0.8597            | 0.8144           | 0.0453           | 5.3%                  |

## References

1. Bossard C, Jarry A, Colombeix C, et al. Phosphohistone H3 labelling for histoprognostic grading of breast adenocarcinomas and computer-assisted determination of mitotic index. *J Clin Pathol* 2006; 59: 706-710
2. Ribalta T, McCutcheon IE, Aldape KD, et al. The mitosis-specific antibody anti-phosphohistone-H3 (PHH3) facilitates rapid reliable grading of meningiomas according to WHO 2000 criteria. *Am J Surg Pathol* 2004; 28: 1532-1536
3. Skaland I, Janssen EA, Gudlaugsson E, et al. Phosphohistone H3 expression has much stronger prognostic value than classical prognosticators in invasive lymph node-negative breast cancer patients less than 55 years of age. *Mod Pathol* 2007; 20: 1307-1315
4. Skaland I, Janssen EA, Gudlaugsson E, et al. Validating the prognostic value of proliferation measured by Phosphohistone H3 (PPH3) in invasive lymph node-negative breast cancer patients less than 71 years of age. *Breast Cancer Res Treat* 2008; 114: 39-45
5. Scott IS, Heath TM, Morris LS, et al. A novel immunohistochemical method for estimating cell cycle Part distribution in ovarian serous neoplasms: implications for the histopathological assessment of paraffin-embedded specimens. *Br J Cancer* 2004; 90: 1583-1590



- 1  
2  
3  
4  
5  
6  
7  
8  
9  
10  
11  
12  
13  
14  
15  
16  
17  
18  
19  
20  
21  
22  
23  
24  
25  
26  
27  
28  
29  
30  
31  
32  
33  
34  
35  
36  
37  
38  
39  
40  
41  
42  
43  
44  
45  
46  
47  
48  
49  
50  
51  
52  
53  
54  
55  
56  
57  
58  
59  
60  
6. Scott IS, Morris LS, Bird K, et al. A novel immunohistochemical method to estimate cell-cycle Part distribution in archival tissue: implications for the prediction of outcome in colorectal cancer. *J Pathol* 2003; 201: 187-197
7. Chatrath P, Scott IS, Morris LS, et al. Immunohistochemical estimation of cell cycle Part in laryngeal neoplasia. *Br J Cancer* 2006; 95: 314-321
8. Scott IS, Morris LS, Rushbrook SM, et al. Immunohistochemical estimation of cell cycle entry and Part distribution in astrocytomas: applications in diagnostic neuropathology. *Neuropathol Appl Neurobiol* 2005; 31: 455-466
9. Colman H, Giannini C, Huang L, et al. Assessment and prognostic significance of mitotic index using the mitosis marker phospho-histone H3 in low and intermediate-grade infiltrating astrocytomas. *Am J Surg Pathol* 2006; 30: 657-664
10. Kim YJ, Ketter R, Steudel WI, et al. Prognostic significance of the mitotic index using the mitosis marker anti-phosphohistone H3 in meningiomas. *Am J Clin Pathol* 2007; 128: 118-125
11. Kapur P, Rakheja D, Balani JP, et al. Phosphorylated histone H3, Ki-67, p21, fatty acid synthase, and cleaved caspase-3 expression in benign and atypical granular cell tumors. *Arch Pathol Lab Med* 2007; 131: 57-64
12. Hirata A, Inada K, Tsukamoto T, et al. Characterization of a monoclonal antibody, HTA28, recognizing a histone H3 phosphorylation site as a useful marker of M-Part cells. *J Histochem Cytochem* 2004; 52:1503-1509

1  
2  
3  
4  
5  
6  
7  
8  
9  
10  
11  
12  
13  
14  
15  
16  
17  
18  
19  
20  
21  
22  
23  
24  
25  
26  
27  
28  
29  
30  
31  
32  
33  
34  
35  
36  
37  
38  
39  
40  
41  
42  
43  
44  
45  
46  
47  
48  
49  
50  
51  
52  
53  
54  
55  
56  
57  
58  
59  
60

**Figure Legend**

**Figure 1** Photomicrographs of ovarian cancer samples stained with the validated IHC protocol for pHH3 (Ser10) or pHH3 (Ser28). Scale bar = 50  $\mu$ m

For peer review only

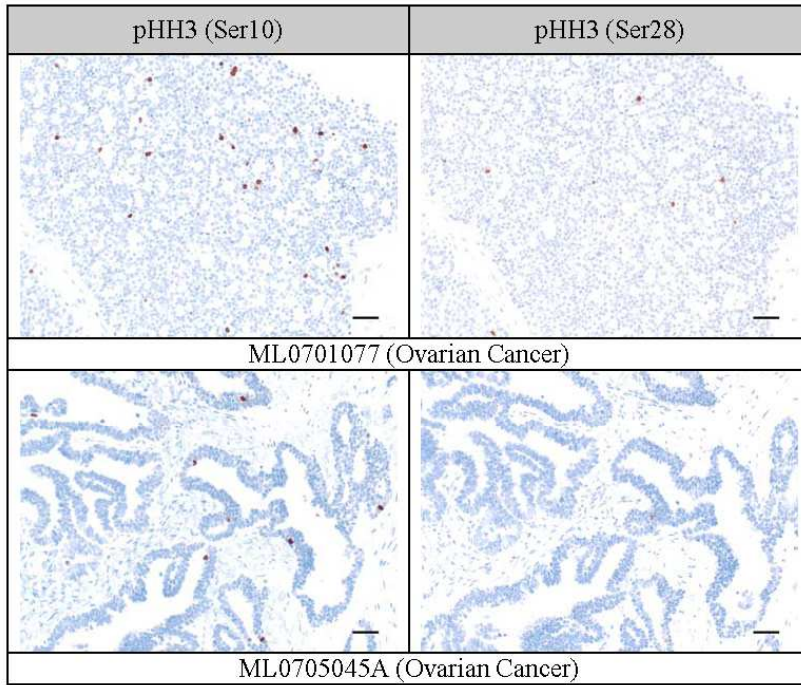

1  
2  
3  
4  
5  
6  
7  
8  
9  
10  
11  
12  
13  
14  
15  
16  
17  
18  
19  
20  
21  
22  
23  
24  
25  
26  
27  
28  
29  
30  
31  
32  
33  
34  
35  
36  
37  
38  
39  
40  
41  
42  
43  
44  
45  
46  
47  
48  
49  
50  
51  
52  
53  
54  
55  
56  
57  
58  
59  
60

1  
2  
3  
4  
5  
6  
7  
8  
9  
10  
11  
12  
13  
14  
15  
16  
17  
18  
19  
20  
21  
22  
23  
24  
25  
26  
27  
28  
29  
30  
31  
32  
33  
34  
35  
36  
37  
38  
39  
40  
41  
42  
43  
44  
45  
46  
47  
48  
49  
50  
51  
52  
53  
54  
55  
56  
57  
58  
59  
60

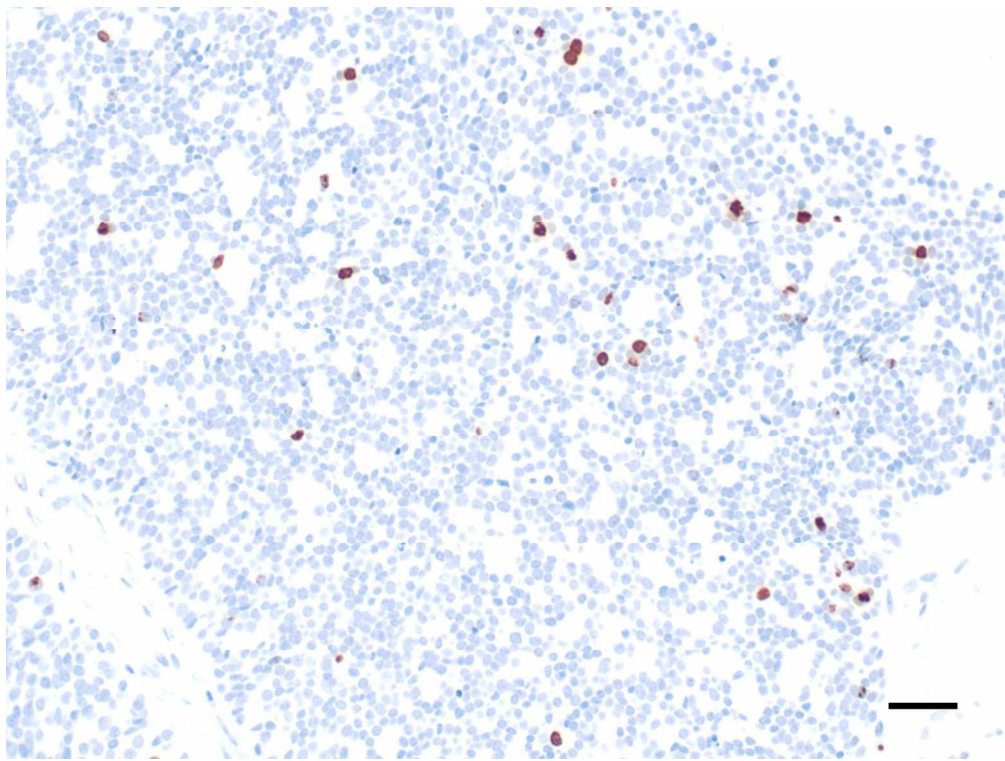

423x317mm (96 x 96 DPI)

ew only

1  
2  
3  
4  
5  
6  
7  
8  
9  
10  
11  
12  
13  
14  
15  
16  
17  
18  
19  
20  
21  
22  
23  
24  
25  
26  
27  
28  
29  
30  
31  
32  
33  
34  
35  
36  
37  
38  
39  
40  
41  
42  
43  
44  
45  
46  
47  
48  
49  
50  
51  
52  
53  
54  
55  
56  
57  
58  
59  
60

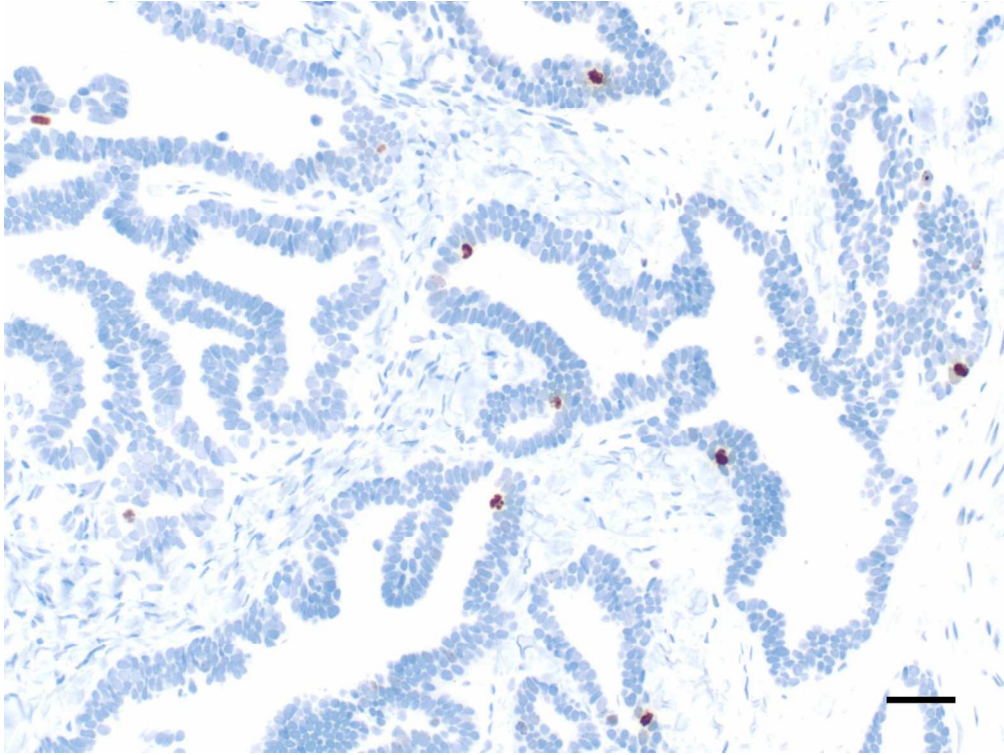

423x317mm (96 x 96 DPI)

ew only



1  
2  
3  
4  
5  
6  
7  
8  
9  
10  
11  
12  
13  
14  
15  
16  
17  
18  
19  
20  
21  
22  
23  
24  
25  
26  
27  
28  
29  
30  
31  
32  
33  
34  
35  
36  
37  
38  
39  
40  
41  
42  
43  
44  
45  
46  
47  
48  
49  
50  
51  
52  
53  
54  
55  
56  
57  
58  
59  
60

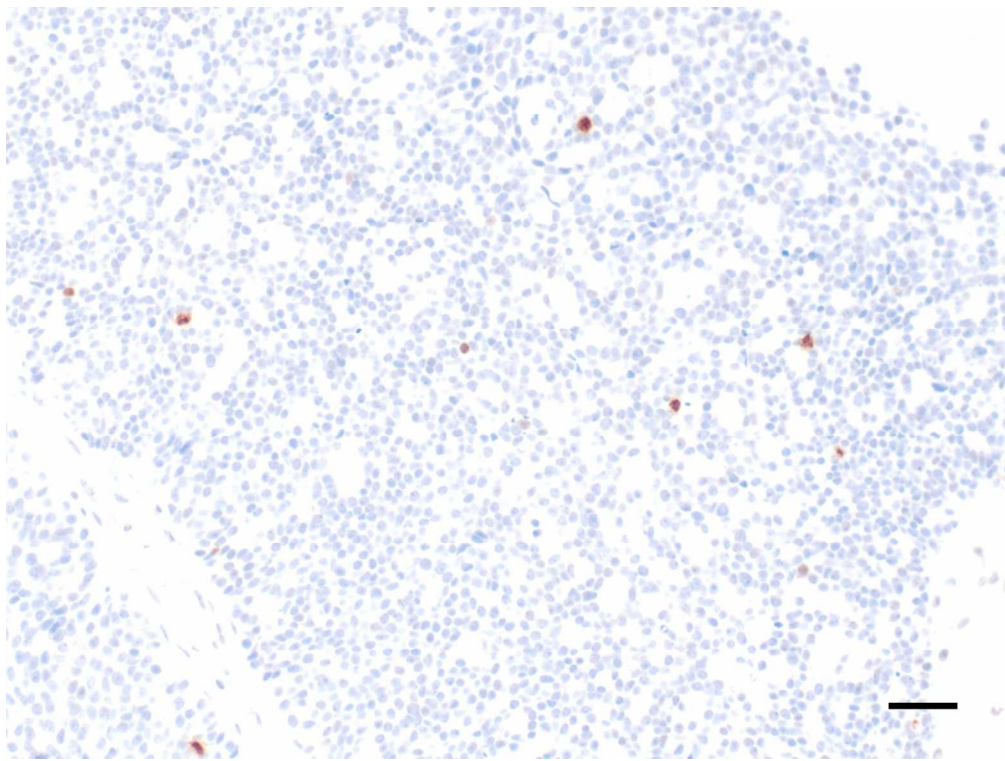

423x317mm (96 x 96 DPI)

Review only

1  
2  
3  
4  
5  
6  
7  
8  
9  
10  
11  
12  
13  
14  
15  
16  
17  
18  
19  
20  
21  
22  
23  
24  
25  
26  
27  
28  
29  
30  
31  
32  
33  
34  
35  
36  
37  
38  
39  
40  
41  
42  
43  
44  
45  
46  
47  
48  
49  
50  
51  
52  
53  
54  
55  
56  
57  
58  
59  
60

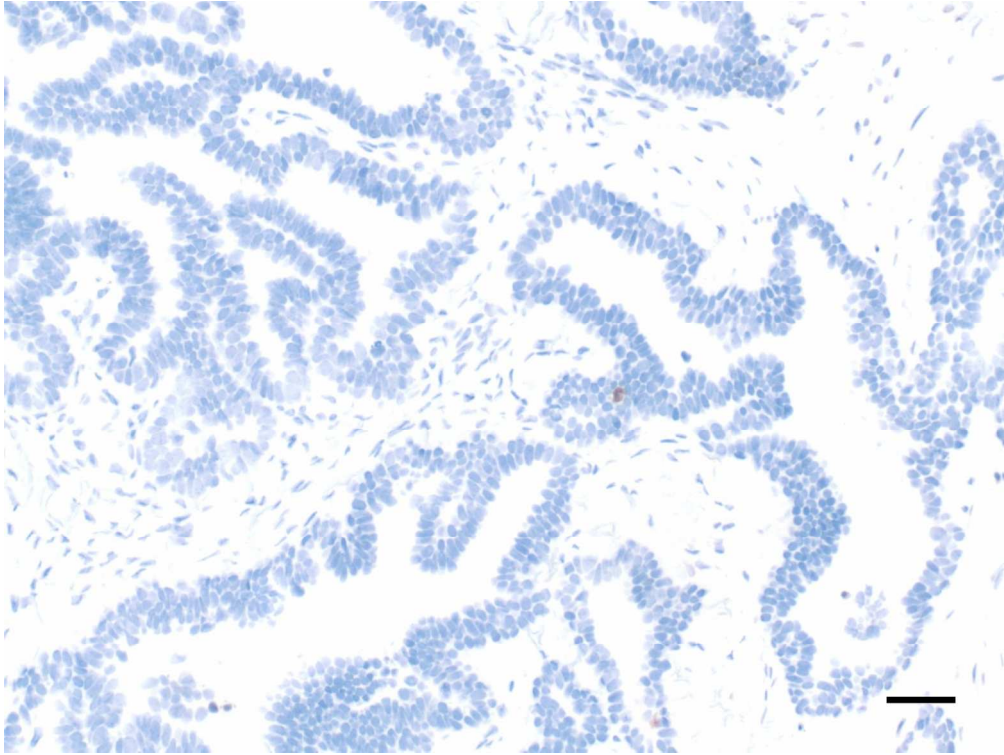

423x317mm (96 x 96 DPI)

Review only

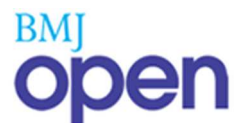

### Level of phosphohistone H3 among various types of human cancers

|                                 |                                                                                                                                                                                                                                                      |
|---------------------------------|------------------------------------------------------------------------------------------------------------------------------------------------------------------------------------------------------------------------------------------------------|
| Journal:                        | <i>BMJ Open</i>                                                                                                                                                                                                                                      |
| Manuscript ID:                  | bmjopen-2012-001071.R1                                                                                                                                                                                                                               |
| Article Type:                   | Research                                                                                                                                                                                                                                             |
| Date Submitted by the Author:   | 30-May-2012                                                                                                                                                                                                                                          |
| Complete List of Authors:       | Sun, Amy; Merck Sharp & Dohme Corp., Zhou, Wei; Merck Sharp & Dohme Corp., Lunceford, Jared; Merck Sharp & Dohme Corp., Strack, Peter; Merck Sharp & Dohme Corp., Dauffenbach, Lisa; Mosaic Laboratories, Kerfoot, Christopher; Mosaic Laboratories, |
| <b>Primary Subject Heading</b>: | Diabetes and endocrinology                                                                                                                                                                                                                           |
| Secondary Subject Heading:      | Dentistry and oral medicine                                                                                                                                                                                                                          |
| Keywords:                       | ANAESTHETICS, Adult intensive & critical care < ANAESTHETICS, Anaesthesia in obstetrics < ANAESTHETICS                                                                                                                                               |
|                                 |                                                                                                                                                                                                                                                      |

SCHOLARONE™  
Manuscripts



## Level of phosphohistone H3 among various types of human cancers

Amy Sun<sup>1\*</sup>, Wei Zhou<sup>1</sup>, Jared Lunceford<sup>1</sup>, Peter Strack<sup>1</sup>, Lisa M. Dauffenbach<sup>2</sup>,  
Christopher A. Kerfoot<sup>2</sup>

<sup>1</sup>Merck Sharp & Dohme Corp., One Merck Drive, Whitehouse Station, NJ 08889, United States; <sup>2</sup>Mosaic Laboratories, LLC, 12 Spectrum Pointe Drive, Lake Forest, CA 92630, United States

\*Correspondence to Dr. Amy Sun, 351 N. Sumneytown Pike, PO Box 1000, North Wales, PA 19454-1099, United States E-mail: [amy.sun@merck.com](mailto:amy.sun@merck.com); Telephone: 267 - 305-1350; Fax: 267 -305-6529

**Running title:** Phosphohistone H3 level in human cancers

**Keywords:** phospho-Histone H3, pHH3, immunohistochemistry, cancer

**Word Count:** 1590 words

### Author contributions:

AS conceived, designed or planned the study; AS, LD, and CK collected or assembled data and performed or supervised analyses. AS, WZ, JL, PS, LD, and CK interpreted results. AS, WZ, JL, and LD wrote sections of initial draft; AS, WZ, JL, PS, LD, and CK provided substantive suggestions for revision or critically reviewed subsequent iterations of manuscript. All authors reviewed and approved final version of the manuscript.

**Abstract**

**Aims** Immunohistochemistry to assess the mitotic index marker phosphorylated histone H3 (pHH3) is often implemented for monitoring drug-mediated mitotic changes in clinical trials; however, data on the expression level of pHH3 (Ser10) and pHH3 (Ser28) among different cancers are limited.

**Methods** Using immunohistochemistry, pHH3 levels were measured using both pHH3 (Ser10) and (Ser28) antibodies among 10 human melanoma and 10 ovarian tumor samples. The samples were reviewed blindly by two reviewers. pHH3 (Ser10) was then selected to measure the pHH3 levels in cancers of breast, colorectal, esophageal, gastric, head and neck, and lung ( $n=5$  for each cancer).

**Results** The pHH3 (Ser10) expression was higher than pHH3 (Ser28) in both melanoma and ovarian cancers ( $p<0.01$ ), with the mean (standard deviation, SD) levels of 1.28% (0.47%) for Ser10 and 0.53% (0.44%) for Ser28 among melanoma, and 3.47% (3.51%) for Ser10 and 0.62% (0.68%) for Ser28 among ovarian cancers, respectively. No statistically significant differences were observed among different cancer types tested for pHH3 using Ser10 ( $p=0.197$ ). No reviewer effect was identified.

**Conclusions** The pHH3 Ser10 was significantly higher than Ser28 and may serve as the more robust of two pHH3 assays for measuring mitotic index.

## Introduction

Microscopic evaluation of mitotic activity is a routine procedure in assessing the grade of malignancy in tumors such as soft tissue sarcoma and breast adenocarcinoma.[1] Histone H3 is a core histone protein, which together with the other histones forms the major protein constituents of chromatin in eukaryotic cells. Anti-phosphorylated histone H3 (pHH3) antibodies specifically detect the core protein histone H3 only when phosphorylated at serine 10 (Ser10) or serine 28 (Ser28). Immunohistochemistry (IHC) for pHH3 has been used for mitotic cell counting in different types of tumors as marker of cells in late G2 and M Part. Multiple studies have demonstrated strong correlation between pHH3-based IHC and standard mitotic counts performed on samples stained with hematoxylin and eosin (H&E).[1, 2] Comparisons between pre- and post-treatment pHH3 levels are often used to evaluate the effectiveness of mitotic inhibitors in pre-clinical *in vitro* studies and clinical trials.

There is only limited information on the expression level of pHH3 among different types of cancers including breast,[1, 3, 4] ovarian,[5] colorectal,[6] squamous cell carcinoma of the larynx,[7] intracerebral gliomas (primary intracerebral astrocytoma),[8, 9] meningioma,[2, 10] and granular cell tumors (GCTs).[11] Different phosphorylation sites (i.e. Ser10, Ser28), different antibodies and measurement units (i.e. mitotic index, label index, labeling fraction) were used in these studies in different labs, and there were large variations in the pHH3 levels across studies and cancer types. To our knowledge, this study was the first study to investigate the expression levels of pHH3 across different types of cancers, using uniform techniques and assay platforms in a single laboratory.

## Materials and methods

### Study design

This study was conducted in two Parts. The purpose of Part I was to perform IHC using pHH3 (Ser10) and pHH3 (Ser28) [antibodies](#) in formalin-fixed, paraffin-embedded (FFPE) human melanoma, ~~and~~ ovarian cancer (10 samples in each cancer type) [and differentially treated HeLa cells](#) to evaluate which antibody corresponded to higher expression levels. The purpose of Part II was to perform IHC using the antibody that demonstrated higher expression levels in Part I, in human cancers of breast, colorectal, esophageal, gastric, esophageal, non-small cell lung samples (NSCLC) and head & neck, and (5 in each type). A second evaluation of the percent positive staining of pHH3 (Ser10) and pHH3 (Ser28) in human melanoma and ovarian cancer were performed blindly to assess the levels of pHH3 from two independent readers.

FFPE human cancers were provided by Mosaic Laboratories tissue bank, and were procured under an Institutional Review Board reviewed protocol. [Formalin-fixed, paraffin embedded cell blocks were prepared from differentially-treated HeLa cells \(ATCC, Manassas, VA\) in order to address the IHC assay specificity. HeLa cells were either untreated, treated with nocodazole \(0.333 uM nocodazole for 18 hours\) or treated with double thymidine block \(1.65 mM thymidine for 18 hours, 8 hours media, 1.65 mM thymidine for an additional 18 hours\) prior to fixation.](#)

pHH3 Ser 10 (rabbit IgG, polyclonal) antibodies were purchased from Upstate (Billerica, CA), and pHH3 Ser 28 (rabbit IgG, Clone E191) were purchased from Epitomics (Burlingame, CA).

## Immunohistochemistry

Immunohistochemistry was performed in accordance with Mosaic Laboratories'

validated protocols. Specimens were sectioned at 4 microns thickness, mounted onto positive-charged glass slides, dried, baked, deparaffinized, and rehydrated. Following rehydration, tissue sections were incubated in Envision Peroxidase (Dako, Carpinteria, CA) for 5 minutes to quench endogenous peroxidase. Tissue sections then underwent pretreatment using High Tide Buffer (Mosaic Laboratories, Lake Forest, CA) for 40 minutes in a waterbath set to 95°C followed by a rinse in Splash-T bBuffer (Mosaic Laboratories). Slides were incubated with Sniper (Biocare Medical, Concord, CA) for 5 minutes, which was then tapped off onto an absorbent pad. Slides were incubated with pHH3 (Ser28) antibody or pHH3 (Ser10) diluted in Dako Diluent (Dako) for 30 minutes. Slides were then rinsed in buffer for 5 minutes followed by detection using the Envision+ Rabbit HRP detection reagent (Dako) for 30 minutes. Slides were rinsed with buffer for 5 minutes followed by incubation with DAB (Dako) for either 5 minutes (Ser10) or 10 minutes (Ser28). Slides were rinsed with water, counterstained with Dako hematoxylin, blued in ammonia water, dehydrated through graded alcohols, cleared in xylene, and coverslipped. Briefly, 4 micron tissue slides were deparaffinized with xylene and ethanol. Antigen retrieval was performed using High Tide Buffer (Mosaic Laboratories) for 40 minutes in a 95°C waterbath. Samples were blocked with Sniper (Biocare Medical) for 5 minutes followed by incubation with diluted pHH3 (Ser28) or pHH3 (Ser10) antibody for 30 minutes. The primary antibody was detected with Envision+ Rabbit HRP/DAB detection kit (Dako). Hematoxylin was used for counterstaining.

1  
2  
3  
4  
5  
6  
7  
8 Enumeration was performed by manual review of approximately 600-1000 cells per  
9 image, where possible.  
10  
11  
12  
13  
14  
15  
16  
17  
18  
19  
20  
21  
22  
23  
24  
25  
26  
27  
28  
29  
30  
31  
32  
33  
34  
35  
36  
37  
38  
39  
40  
41  
42  
43  
44  
45  
46  
47  
48  
49  
50  
51  
52  
53  
54  
55  
56  
57  
58  
59  
60

For peer review only

### Data analysis

Tests and descriptive statistics (means and standard deviations) were computed by tumor type. Because the data clearly were not normally distributed, with many low measurements and a few outlying high measurements, nonparametric tests were used for comparisons resulting in *p*-values. For the analysis of the Part I data, Wilcoxon's Signed Rank Test was used to compare the pHH3 expression levels as measured by the two different approaches, tested within both tumor types. The Spearman correlation (correlation of the ranks) between Ser10 and Ser28 was calculated for the combined ovarian and melanoma samples. Wilcoxon's Rank Sum Test was used to compare pHH3 levels between tumor types in Part I. For Part II tests, the Kruskal-Wallis test, a nonparametric alternative to ANOVA (analysis of variance) was used to compare the pHH3 levels between different types of cancers.

For variability assessment between two evaluators, a variance components analysis of log (% Ser10) and log (% Ser28) data was conducted. The mixed model included an intercept term, a fixed effect for reviewer, a random effect for the particular stained sample that was repeatedly measured, and a random residual error term. The latter two terms allow us to decompose the overall variance as a sum of variance from sample-to-sample and variance due to repeated review of the sample.

## Results

Demographic, clinical, and pHH3 staining information on different types of cancer were summarized in Table 1. IHC staining of two ovarian cancer samples is shown for each antibody in Figure 1. In Part I melanoma samples, the percentage of cells that were pHH3 (Ser10)-positive was statistically significantly higher than pHH3 (Ser28) ( $p=0.0039$ ), with mean pHH3 of 1.28% (SD, 0.47; range 0.73-2.13) for Ser10 and 0.53% (SD, 0.44; range 0.14-1.69) for Ser28. In Part I ovarian cancer samples, mean pHH3 was also significantly higher for Ser10 than Ser28 ( $p=0.0020$ ) with a mean of 3.47% (SD, 3.51; range 0.60-11.70) for Ser10 and 0.62% (SD, 0.68; range 0-2.30) for Ser28. The Spearman correlation of Ser10 with Ser28 ( $N=20$ , using both tumor types) was positive 0.30 but not statistically significant ( $p=0.1966$ ), indicating that these two measures do not track each other within a sample in a robust fashion. Comparing pHH3 levels between ovarian and melanoma tumor samples, there was some evidence of a significant difference as measured by Ser10 ( $p=0.0638$ ), but not Ser28 ( $p=1.000$ ). Based on the above results, Ser10 was selected as the antibody for assaying pHH3 in Part II.

In Part II, mean pHH3 Ser10 expression was highest in colorectal cancer (3.73%, SD 2.45%), followed by head & neck cancer (3.00%, SD 2.33%), gastric cancer (2.74%, SD 1.62%), esophageal cancer (2.36%, SD 1.08%), breast cancer (1.80%, SD 0.35%), NSCLC (1.42%, SD 0.88%). The differences in these six tumor types assessed in Part II were not found to be statistically significant at these limited group sizes via nonparametric testing ( $p=0.1969$ ).

IHC staining results for the differentially cultured HeLa cells are listed in Table 2 and images are presented in Figure 2. Staining was less frequent with the pHH3 (Ser28)



1  
2  
3  
4  
5  
6  
7  
8 assay than the pHH3 (Ser10) in untreated (0.5% vs. 4.75%) and nocodazole-treated  
9 (30.10% vs. 51.16%) HeLa cells, although similar in thymidine-treated HeLa cells  
10 (1.78% vs. 1.91%). In HeLa cells stained with both pHH3 IHC assays, the staining  
11 intensity of positive cells was similar between Ser10 and Ser28 pHH3 IHC assays.

12  
13  
14  
15  
16 Manual enumeration performed by two independent reviewers of the percent  
17 positive staining observed in melanoma and ovarian cancer samples is summarized in  
18 Table 23. The percent positive staining was performed on approximately 1000 tumor  
19 cells per image, which was consistent for each reviewer.

20  
21  
22  
23  
24 No significant difference was found between results generated by independent  
25 reviewers. Table 2-3 provides results for breakdown of the overall variance. With the  
26 exception of Ser10 in Melanoma, results indicate the variability from sample-to-sample is  
27 the dominant source of variation, and that multiple reviews of the same stained sample is  
28 a relatively minor component of the overall variability.  
29  
30  
31  
32  
33  
34  
35  
36  
37  
38  
39  
40  
41  
42  
43  
44  
45  
46  
47  
48  
49  
50  
51  
52  
53  
54  
55  
56  
57  
58  
59  
60

Formatted: Indent: First line: 0.5"

## Discussion

Measurement of pHH3 levels can be used for quantifying mitosis and the effectiveness of mitotic inhibitors in early drug development. A number of previous studies have measured pHH3 levels among different types of cancers. Studies suggested that pHH3 index increased with higher grade of tumor, including cancers of breast, ovarian, melanoma, vulval intraepithelial neoplasia, and meningioma, and limited studies suggested no difference between different grade of tumor for colorectal cancer or squamous cell carcinoma of the larynx.[1-7, 10] The pHH3 levels have been shown to be a prognostic factor for different types of cancers. At the time this study was performed, there were no data comparing pHH3 levels between Ser10 and Ser28 and pHH3 levels across different types of cancers.

Using uniformed techniques, and assay platforms in a single laboratory, we assessed pHH3 (Ser 10 and Ser 28) expression levels. Our results suggested that these two antibodies do not correlate to each other within a sample in a robust fashion, and pHH3 values measured using Ser10 were significantly higher than those obtained via Ser28. The results were confirmed by a second, independent reviewer of the slides.

A greater fraction of cells stained for pHH3 (Ser10) than pHH3 (Ser28) in untreated (4.75% and 0.5%, respectively) and nocodazole-treated HeLa cells (51.16% and 30.10%, respectively), although results were similar in thymidine-treated cells. Nocodazole arrests cells in M phase, so the increase in staining frequency is consistent with expectations of specificity for mitotic cells. In HeLa cells stained with both pHH3 IHC assays, the staining intensity of positive cells was similar between Ser10 and Ser28 pHH3 IHC assays. Note, this observation was also noted in HeLa cells treated with

~~Noceodazole (51.16% for Ser10 and 30.10% for Ser28), though data is not shown.~~

~~Noceodazole is commonly used for synchronization studies and arrests the cells in M phase.~~

There are at least four possibilities for the divergent results. The first is that the phosphorylation sites are differentially regulated, and that not all mitotic cells will demonstrate pHH3 at both sites. The second possibility is that Ser10 is phosphorylated earlier or for a more prolonged period during mitosis than Ser28. Third, the pHH3 (Ser28) has been described as sensitive to delays in time to fixation;<sup>[12]</sup> however samples used for this study were controlled for fixation. Finally, the differences may be simply due to intrinsic antibody characteristics such as affinity and/or specificity. To address whether the decreased proportion of cells stained by pHH3 (Ser28) was because of inadequate sensitivity, we attempted to increase the sensitivity in specimens with divergent staining results. Increasing the pHH3 (Ser28) primary antibody concentration did not result in an increase in positive cells prior to appearance of non-specific staining (data not shown). This result supports the observation that phosphorylation of Ser28 is present only in a fraction of cells with Ser10 phosphorylation.

In Part II, no significant difference was observed among different tumor types ( $p=0.1969$  non-parametric testing), which may probably be due to the sample size ( $n=5$  for each). In addition, we could not perform subgroup analysis and check the variation of pHH3 levels by different demographic, pathology, and clinical characteristics. Further studies with larger sample sizes are needed to confirm the preliminary findings.

1  
2  
3  
4  
5  
6  
7  
8  
9  
10  
11  
12  
13  
14  
15  
16  
17  
18  
19  
20  
21  
22  
23  
24  
25  
26  
27  
28  
29  
30  
31  
32  
33  
34  
35  
36  
37  
38  
39  
40  
41  
42  
43  
44  
45  
46  
47  
48  
49  
50  
51  
52  
53  
54  
55  
56  
57  
58  
59  
60

In conclusion, mitotic counts performed by evaluating cells that are positive by immunohistochemistry for pHH3 at Ser10 were much higher than at Ser28, and pHH3 (Ser10) should be used for evaluating the effectiveness of mitotic inhibitors.

### Acknowledgements

Authors would like to thank Ms. Sheila Erespe and Ms. Kim Della Penna of Merck for their valuable help in preparing this manuscript.

**Competing interests and Source of Funding:** AS, WZ, JL, and PS are employees of Merck Sharp & Dohme Corp. and may own stock/stock options at Merck. LD and CK received a fee for work done from Merck.

### Article Focus:

• Immunohistochemical detection of phosphorylated histone H3 (pHH3) is often implemented for monitoring drug-mediated mitotic changes in clinical trials; however, data on the expression level among different cancers is limited.

• By comparing the performance of antibodies to pHH3 (Ser10) and pHH3 (Ser28) in the same laboratory and in various cancer specimens, the pHH3 Ser10 was shown to be significantly higher than Ser28 and may serve as the more robust of two pHH3 assays for measuring mitotic index.

### Key messages

- H3 (pHH3) is often implemented for monitoring drug-mediated mitotic changes in clinical trials; however, data on the expression level among different cancers are limited.
- We, for the first time, compared in the same laboratory the performance of two antibodies pHH3 (Ser10) and pHH3 (Ser28), in various cancer specimen.
- The pHH3 Ser10 was significantly higher than Ser28 and may serve as the more robust of two pHH3 assays for measuring mitotic index.

### Strengths and limitations of the study

**Strengths:** At the time this study was performed, there were no data comparing pHH3 levels between Ser10 and Ser28 and pHH3 levels across different types of cancers.

Using uniformed techniques, and assay platforms in a single laboratory, we assessed pHH3 (Ser 10 and Ser 28) expression levels.

**Limitations:** No significant difference was observed among different tumor types ( $p=0.1969$  non-parametric testing), which may probably be due to the sample size ( $n=5$  for each). In addition, we could not perform subgroup analysis and check the variation of pHH3 levels by different demographic, pathology, and clinical characteristics. Further studies with larger sample sizes are needed to confirm the preliminary findings.

**Table 1** The pHH3 expression levels among different types of cancers.

| Tumor type | Sample size | Age (mean, SD) | Gender (male: female)   | Prior Therapy           | Stage                                     | Grade                                | pHH3 (Ser10) percent positive* | pHH3 (Ser 28) percent positive* |
|------------|-------------|----------------|-------------------------|-------------------------|-------------------------------------------|--------------------------------------|--------------------------------|---------------------------------|
| Melanoma   | 10          | 58.5 (14.1)    | M = 3<br>F = 7          | Y = 5<br>N = 4<br>U = 1 | II = 1<br>III = 0<br>6<br>IV = 1<br>U = 2 | G1 = 0<br>G2 = 6<br>G3 = 0<br>U = 10 | 1.28 (0.47);<br>0.73-2.13      | 0.53 (0.44);<br>0.14-1.69       |
| Ovarian    | 10          | 61.7 (7.3)     | M = 0<br>F = 10         | Y = 1<br>N = 0<br>U = 9 | II = 0<br>III = 4<br>IV = 2<br>U = 4      | G1 = 0<br>G2 = 1<br>G3 = 6<br>U = 3  | 3.47 (3.51);<br>0.60-11.70     | 0.62 (0.68);<br>0.00-2.30       |
| Colorectal | 5           | 60.4 (13.5)    | M = 3<br>F = 1<br>U = 1 | Y = 2<br>N = 0<br>U = 3 | II = 1<br>III = 0<br>IV = 4<br>U = 0      | G1 = 0<br>G2 = 1<br>G3 = 4<br>U = 4  | 3.73 (2.45)                    |                                 |
| Head/neck  | 5           | 55.4 (9.8)     | M = 5<br>F = 0          | Y = 0<br>N = 3<br>U = 2 | II = 0<br>III = 1<br>IV = 0<br>U = 4      | G1 = 0<br>G2 = 2<br>G3 = 1<br>U = 2  | 3.00 (2.33)                    |                                 |
| Gastric    | 5           | 61.6 (20.9)    | M = 4<br>F = 1          | Y = 2<br>N = 0<br>U = 3 | II = 0<br>III = 2<br>IV = 3<br>U = 0      | G1 = 0<br>G2 = 2<br>G3 = 3<br>U = 0  | 2.74 (1.62)                    |                                 |
| Esophageal | 5           | 63.6 (11.4)    | M = 4<br>F = 1          | Y = 1<br>N = 2<br>U = 2 | II = 1<br>III = 1<br>2                    | G1 = 1<br>G2 = 2                     | 2.36 (1.08)                    |                                 |

|        |   |                |                |                         |                                       |                                     |                |  |
|--------|---|----------------|----------------|-------------------------|---------------------------------------|-------------------------------------|----------------|--|
|        |   |                |                |                         | IV = 1<br>0<br>U = 0<br>2             | G3 = 0<br>U = 3                     |                |  |
| Breast | 5 | 61.6<br>(20.6) | M = 0<br>F = 5 | Y = 1<br>N = 0<br>U = 4 | II = 0<br>III = 3<br>IV = 1<br>U = 1  | G1 = 0<br>G2 = 1<br>G3 = 4<br>U = 0 | 1.80<br>(0.35) |  |
| NSCLC  | 5 | 62.2<br>(8.2)  | M = 5<br>F = 0 | Y = 4<br>N = 1<br>U = 0 | II = 0<br>III = 0<br>IV = -1<br>U = 3 | G1 = 0<br>G2 = 0<br>G3 = 0<br>U = 5 | 1.42<br>(0.88) |  |

\* Data are presented as mean (SD), and range

**Table 2** pHH3 expression levels in differentially-treated HeLa cells.

|                         | <u>pHH3<br/>Ser10<br/>% Positive</u> | <u>pHH3<br/>Ser28<br/>% Positive</u> |
|-------------------------|--------------------------------------|--------------------------------------|
| <u>HeLa, Untreated</u>  | <u>4.75%</u>                         | <u>0.50%</u>                         |
| <u>HeLa, Nocodazole</u> | <u>51.16%</u>                        | <u>30.10%</u>                        |
| <u>HeLa, Thymidine</u>  | <u>1.91%</u>                         | <u>1.78%</u>                         |



**Table 2-3** Variance components for log percent positive staining for pHH3 (Ser10) and pHH3 (Ser28) in human melanoma and ovarian cancer.

| Tumor Type | Assay Type | Total Variability | Sample-to-Sample | Review-to-Review | % Total due to Review |
|------------|------------|-------------------|------------------|------------------|-----------------------|
| Melanoma   | Ser10      | 0.1156            | 0.0567           | 0.0589           | 51.0%                 |
|            | Ser28      | 0.5444            | 0.4909           | 0.0535           | 9.8%                  |
| Ovarian    | Ser10      | 0.7362            | 0.7243           | 0.0119           | 1.6%                  |
|            | Ser28      | 0.8597            | 0.8144           | 0.0453           | 5.3%                  |

## References

1. Bossard C, Jarry A, Colombeix C, et al. Phosphohistone H3 labelling for histoprognostic grading of breast adenocarcinomas and computer-assisted determination of mitotic index. *J Clin Pathol* 2006; 59: 706-710
2. Ribalta T, McCutcheon IE, Aldape KD, et al. The mitosis-specific antibody anti-phosphohistone-H3 (PHH3) facilitates rapid reliable grading of meningiomas according to WHO 2000 criteria. *Am J Surg Pathol* 2004; 28: 1532-1536
3. Skaland I, Janssen EA, Gudlaugsson E, et al. Phosphohistone H3 expression has much stronger prognostic value than classical prognosticators in invasive lymph node-negative breast cancer patients less than 55 years of age. *Mod Pathol* 2007; 20: 1307-1315
4. Skaland I, Janssen EA, Gudlaugsson E, et al. Validating the prognostic value of proliferation measured by Phosphohistone H3 (PPH3) in invasive lymph node-negative breast cancer patients less than 71 years of age. *Breast Cancer Res Treat* 2008; 114: 39-45
5. Scott IS, Heath TM, Morris LS, et al. A novel immunohistochemical method for estimating cell cycle Part distribution in ovarian serous neoplasms: implications for the histopathological assessment of paraffin-embedded specimens. *Br J Cancer* 2004; 90: 1583-1590

- 1  
2  
3  
4  
5  
6  
7  
8 6. Scott IS, Morris LS, Bird K, et al. A novel immunohistochemical method to  
9 estimate cell-cycle Part distribution in archival tissue: implications for the  
10 prediction of outcome in colorectal cancer. *J Pathol* 2003; 201: 187-197  
11  
12  
13
- 14 7. Chatrath P, Scott IS, Morris LS, et al. Immunohistochemical estimation of cell  
15 cycle Part in laryngeal neoplasia. *Br J Cancer* 2006; 95: 314-321  
16  
17  
18
- 19 8. Scott IS, Morris LS, Rushbrook SM, et al. Immunohistochemical estimation of  
20 cell cycle entry and Part distribution in astrocytomas: applications in diagnostic  
21 neuropathology. *Neuropathol Appl Neurobiol* 2005; 31: 455-466  
22  
23  
24
- 25 9. Colman H, Giannini C, Huang L, et al. Assessment and prognostic significance  
26 of mitotic index using the mitosis marker phospho-histone H3 in low and  
27 intermediate-grade infiltrating astrocytomas. *Am J Surg Pathol* 2006; 30: 657-664  
28  
29  
30
- 31 10. Kim YJ, Ketter R, Steudel WI, et al. Prognostic significance of the mitotic index  
32 using the mitosis marker anti-phosphohistone H3 in meningiomas. *Am J Clin  
33 Pathol* 2007; 128: 118-125  
34  
35  
36  
37  
38
- 39 11. Kapur P, Rakheja D, Balani JP, et al. Phosphorylated histone H3, Ki-67, p21,  
40 fatty acid synthase, and cleaved caspase-3 expression in benign and atypical  
41 granular cell tumors. *Arch Pathol Lab Med* 2007; 131: 57-64  
42  
43  
44
- 45 12. Hirata A, Inada K, Tsukamoto T, et al. Characterization of a monoclonal  
46 antibody, HTA28, recognizing a histone H3 phosphorylation site as a useful  
47 marker of M-Part cells. *J Histochem Cytochem* 2004; 52:1503-1509  
48  
49  
50  
51  
52  
53  
54

1  
2  
3  
4  
5  
6  
7  
8 **Figure Legend**  
9

10  
11 **Figure 1** Photomicrographs of ovarian cancer samples stained with the validated IHC protocol for pHH3  
12 (Ser10) or pHH3 (Ser28). Scale bar = 50  $\mu$ m  
13  
14  
15  
16  
17  
18  
19  
20  
21  
22  
23  
24  
25  
26  
27  
28  
29  
30  
31  
32  
33  
34  
35  
36  
37  
38  
39  
40  
41  
42  
43  
44  
45  
46  
47  
48  
49  
50  
51  
52  
53  
54  
55  
56  
57  
58  
59  
60

1  
2  
3  
4  
5  
6  
7  
8  
9  
10  
11  
12  
13  
14  
15  
16  
17  
18  
19  
20  
21  
22  
23  
24  
25  
26  
27  
28  
29  
30  
31  
32  
33  
34  
35  
36  
37  
38  
39  
40  
41  
42  
43  
44  
45  
46  
47  
48  
49  
50  
51  
52  
53  
54  
55  
56  
57  
58  
59  
60

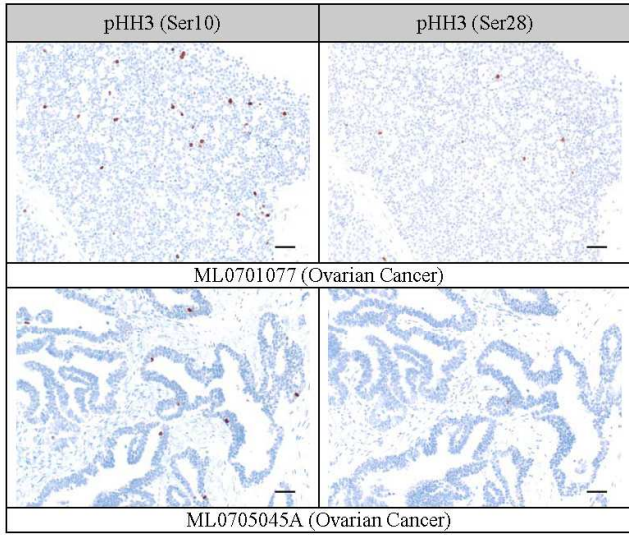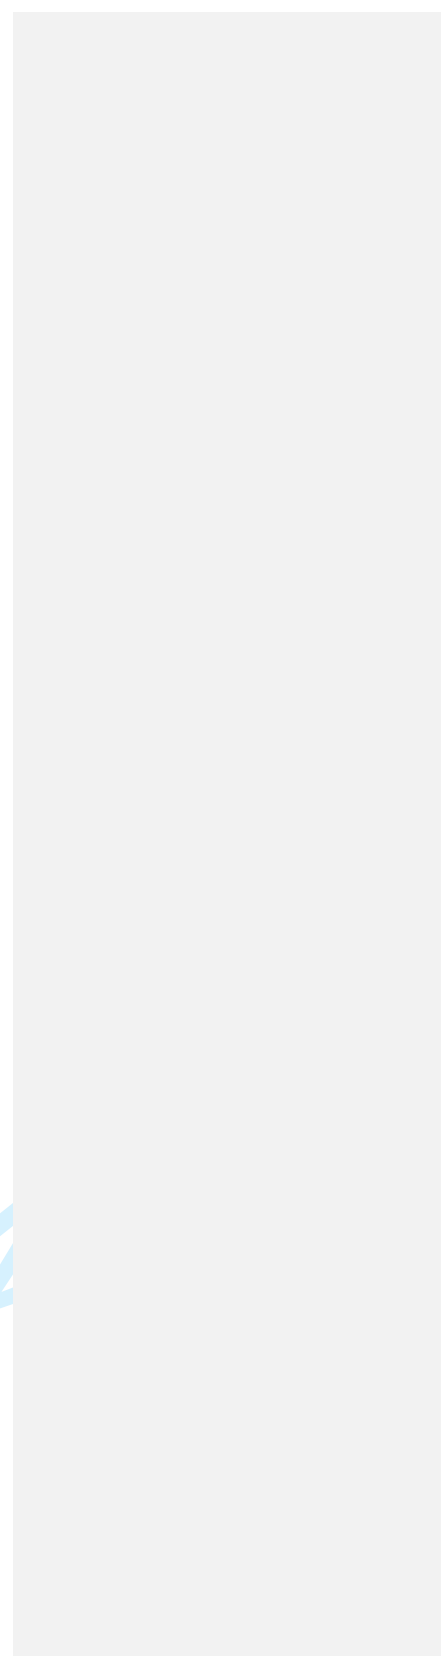

**Figure 2** Photomicrographs (20X) of the HeLa cell line stained with the validated IHC protocol for pHH3 (Ser10) or pHH3 (Ser28).

**Formatted:** Font: Bold

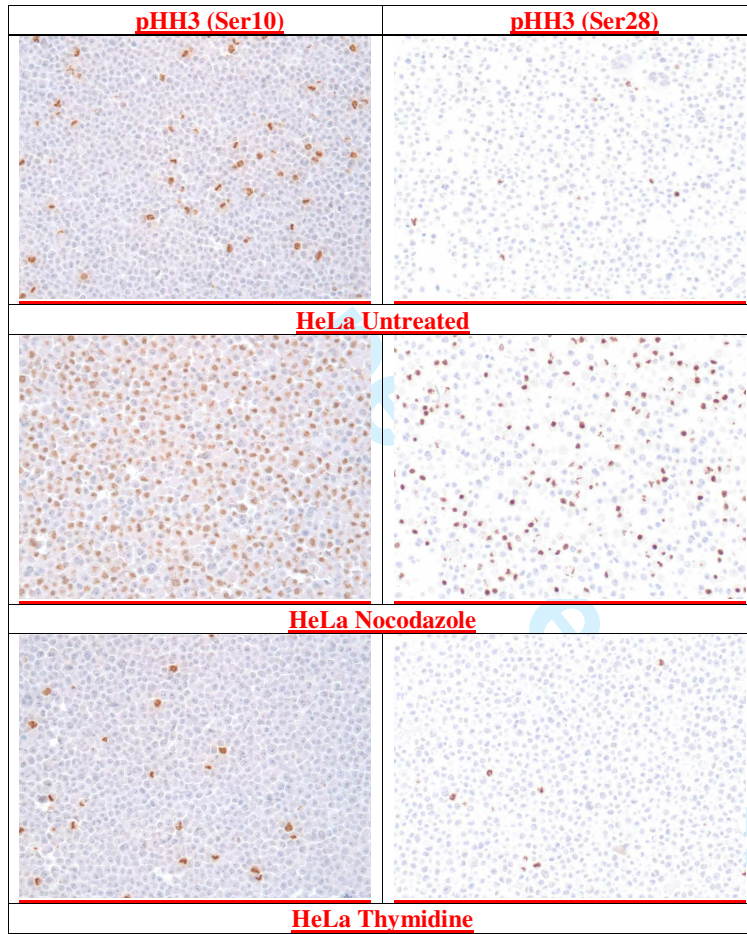

1  
2  
3  
4  
5  
6  
7  
8  
9  
10  
11  
12  
13  
14  
15  
16  
17  
18  
19  
20  
21  
22  
23  
24  
25  
26  
27  
28  
29  
30  
31  
32  
33  
34  
35  
36  
37  
38  
39  
40  
41  
42  
43  
44  
45  
46  
47  
48  
49  
50  
51  
52  
53  
54  
55  
56  
57  
58  
59  
60



423x317mm (96 x 96 DPI)

ew only



1  
2  
3  
4  
5  
6  
7  
8  
9  
10  
11  
12  
13  
14  
15  
16  
17  
18  
19  
20  
21  
22  
23  
24  
25  
26  
27  
28  
29  
30  
31  
32  
33  
34  
35  
36  
37  
38  
39  
40  
41  
42  
43  
44  
45  
46  
47  
48  
49  
50  
51  
52  
53  
54  
55  
56  
57  
58  
59  
60

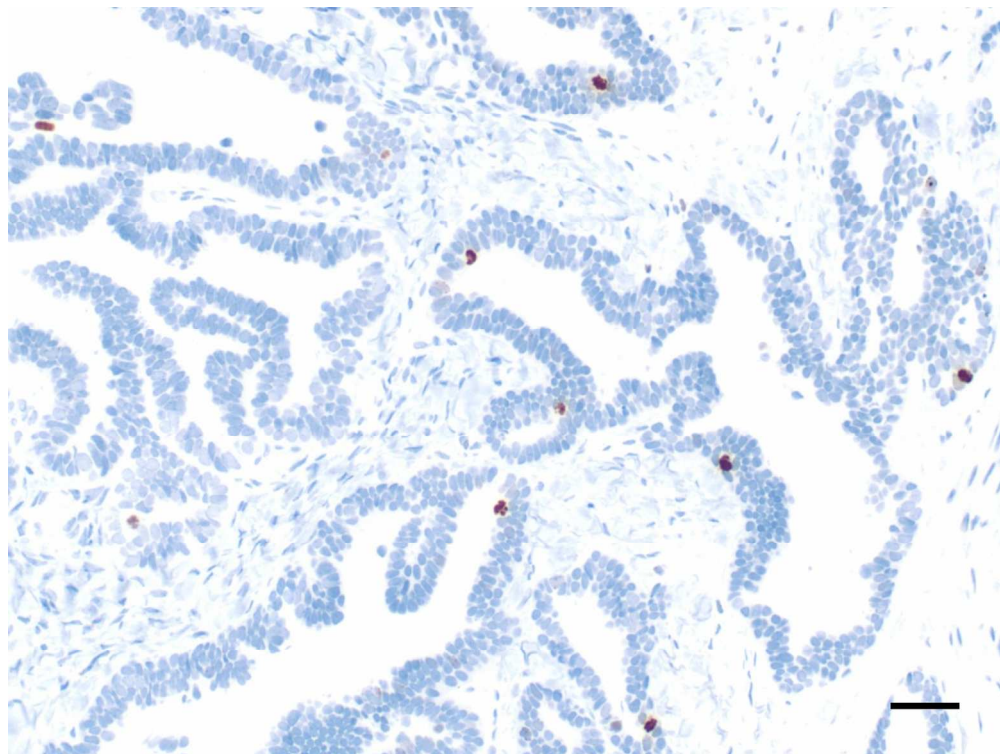

423x317mm (96 x 96 DPI)

View only



1  
2  
3  
4  
5  
6  
7  
8  
9  
10  
11  
12  
13  
14  
15  
16  
17  
18  
19  
20  
21  
22  
23  
24  
25  
26  
27  
28  
29  
30  
31  
32  
33  
34  
35  
36  
37  
38  
39  
40  
41  
42  
43  
44  
45  
46  
47  
48  
49  
50  
51  
52  
53  
54  
55  
56  
57  
58  
59  
60



423x317mm (96 x 96 DPI)

Review only

1  
2  
3  
4  
5  
6  
7  
8  
9  
10  
11  
12  
13  
14  
15  
16  
17  
18  
19  
20  
21  
22  
23  
24  
25  
26  
27  
28  
29  
30  
31  
32  
33  
34  
35  
36  
37  
38  
39  
40  
41  
42  
43  
44  
45  
46  
47  
48  
49  
50  
51  
52  
53  
54  
55  
56  
57  
58  
59  
60

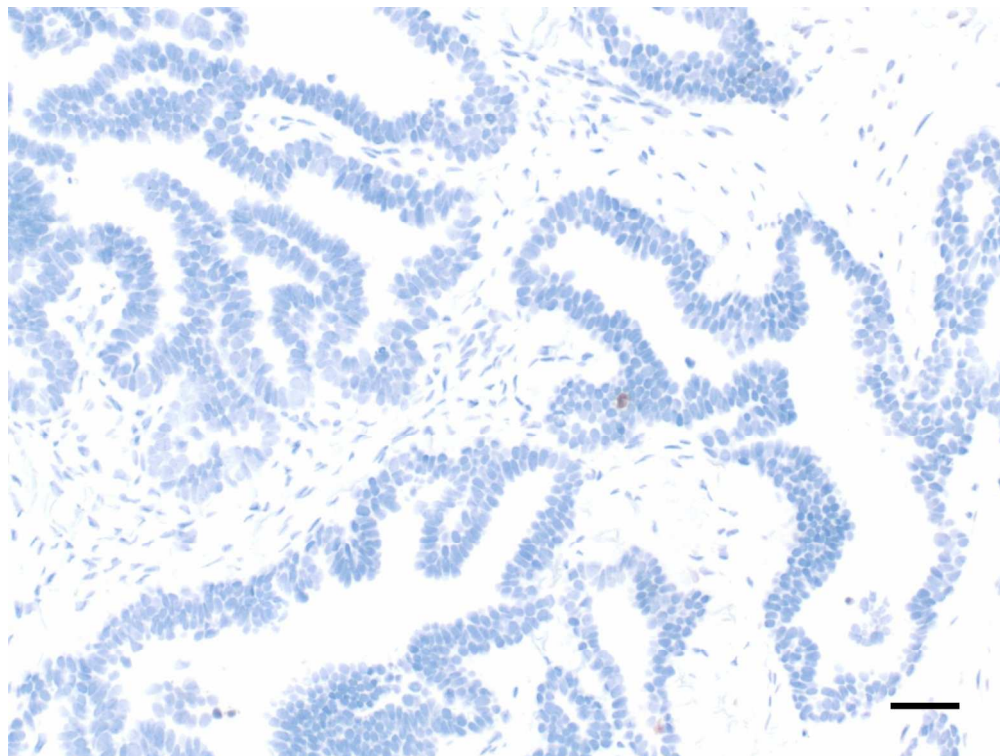

423x317mm (96 x 96 DPI)

Review only

1  
2  
3  
4  
5  
6  
7  
8  
9  
10  
11  
12  
13  
14  
15  
16  
17  
18  
19  
20  
21  
22  
23  
24  
25  
26  
27  
28  
29  
30  
31  
32  
33  
34  
35  
36  
37  
38  
39  
40  
41  
42  
43  
44  
45  
46  
47  
48  
49  
50  
51  
52  
53  
54  
55  
56  
57  
58  
59  
60

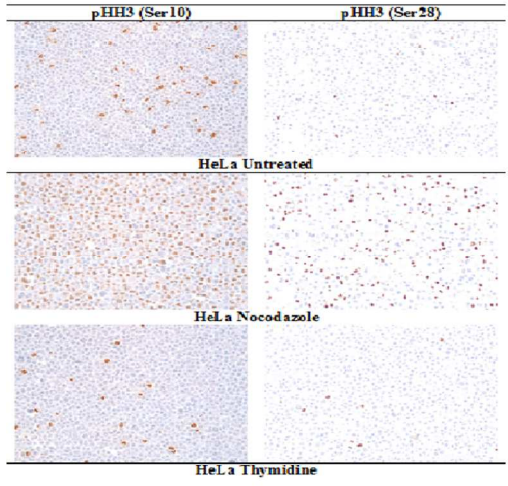

243x152mm (120 x 120 DPI)

Review only



### Level of phosphohistone H3 among various types of human cancers

|                                 |                                                                                                                                                                                                                                                      |
|---------------------------------|------------------------------------------------------------------------------------------------------------------------------------------------------------------------------------------------------------------------------------------------------|
| Journal:                        | <i>BMJ Open</i>                                                                                                                                                                                                                                      |
| Manuscript ID:                  | bmjopen-2012-001071.R2                                                                                                                                                                                                                               |
| Article Type:                   | Research                                                                                                                                                                                                                                             |
| Date Submitted by the Author:   | 25-Jul-2012                                                                                                                                                                                                                                          |
| Complete List of Authors:       | Sun, Amy; Merck Sharp & Dohme Corp., Zhou, Wei; Merck Sharp & Dohme Corp., Lunceford, Jared; Merck Sharp & Dohme Corp., Strack, Peter; Merck Sharp & Dohme Corp., Dauffenbach, Lisa; Mosaic Laboratories, Kerfoot, Christopher; Mosaic Laboratories, |
| <b>Primary Subject Heading</b>: | Diabetes and endocrinology                                                                                                                                                                                                                           |
| Secondary Subject Heading:      | Dentistry and oral medicine                                                                                                                                                                                                                          |
| Keywords:                       | ANAESTHETICS, Adult intensive & critical care < ANAESTHETICS, Anaesthesia in obstetrics < ANAESTHETICS                                                                                                                                               |
|                                 |                                                                                                                                                                                                                                                      |

SCHOLARONE™  
Manuscripts

# Level of phosphohistone H3 among various types of human cancers

Amy Sun<sup>1\*</sup>, Wei Zhou<sup>1</sup>, Jared Lunceford<sup>1</sup>, Peter Strack<sup>1</sup>, Lisa M. Dauffenbach<sup>2</sup>,  
Christopher A. Kerfoot<sup>2</sup>

<sup>1</sup>Merck Sharp & Dohme Corp., One Merck Drive, Whitehouse Station, NJ 08889, United States; <sup>2</sup>Mosaic Laboratories, LLC, 12 Spectrum Pointe Drive, Lake Forest, CA 92630, United States

\*Correspondence to Dr. Amy Sun, 351 N. Sumneytown Pike, PO Box 1000, North Wales, PA 19454-1099, United States E-mail: [amy.sun@merck.com](mailto:amy.sun@merck.com); Telephone: 267 - 305-1350; Fax: 267 -305-6529

**Running title:** Phosphohistone H3 level in human cancers

**Keywords:** phospho-Histone H3, pHH3, immunohistochemistry, cancer

**Word Count:** 1590 words

## Author contributions:

AS conceived, designed or planned the study; AS, LD, and CK collected or assembled data and performed or supervised analyses. AS, WZ, JL, PS, LD, and CK interpreted results. AS, WZ, JL, and LD wrote sections of initial draft; AS, WZ, JL, PS, LD, and CK provided substantive suggestions for revision or critically reviewed subsequent iterations of manuscript. All authors reviewed and approved final version of the manuscript.

## Abstract

**Aims** Immunohistochemistry to assess the mitotic index marker phosphorylated histone H3 (pHH3) is often implemented for monitoring drug-mediated mitotic changes in clinical trials; however, data on the expression level of pHH3 (Ser10) and pHH3 (Ser28) among different cancers are limited.

**Methods** Using immunohistochemistry, pHH3 levels were measured using both pHH3 (Ser10) and (Ser28) antibodies among 10 human melanoma and 10 ovarian tumor samples. The samples were reviewed blindly by two reviewers. pHH3 (Ser10) was then selected to measure the pHH3 levels in cancers of breast, colorectal, esophageal, gastric, head and neck, and lung ( $n=5$  for each cancer).

**Results** The pHH3 (Ser10) expression was higher than pHH3 (Ser28) in both melanoma and ovarian cancers ( $p<0.01$ ), with the mean (standard deviation, SD) levels of 1.28% (0.47%) for Ser10 and 0.53% (0.44%) for Ser28 among melanoma, and 3.47% (3.51%) for Ser10 and 0.62% (0.68%) for Ser28 among ovarian cancers, respectively. No statistically significant differences were observed among different cancer types tested for pHH3 using Ser10 ( $p=0.197$ ). No reviewer effect was identified.

**Conclusions** The pHH3 Ser10 was significantly higher than Ser28 and may serve as the more robust of two pHH3 assays for measuring mitotic index.

## Introduction

Microscopic evaluation of mitotic activity is a routine procedure in assessing the grade of malignancy in tumors such as soft tissue sarcoma and breast adenocarcinoma.[1] Histone H3 is a core histone protein, which together with the other histones forms the major protein constituents of chromatin in eukaryotic cells. Anti-phosphorylated histone H3 (pHH3) antibodies specifically detect the core protein histone H3 only when phosphorylated at serine 10 (Ser10) or serine 28 (Ser28). Immunohistochemistry (IHC) for pHH3 has been used for mitotic cell counting in different types of tumors as marker of cells in late G2 and M Part. Multiple studies have demonstrated strong correlation between pHH3-based IHC and standard mitotic counts performed on samples stained with hematoxylin and eosin (H&E).[1, 2] Comparisons between pre- and post-treatment pHH3 levels are often used to evaluate the effectiveness of mitotic inhibitors in pre-clinical *in vitro* studies and clinical trials.

There is only limited information on the expression level of pHH3 among different types of cancers including breast,[1, 3, 4] ovarian,[5] colorectal,[6] squamous cell carcinoma of the larynx,[7] intracerebral gliomas (primary intracerebral astrocytoma),[8, 9] meningioma,[2, 10] and granular cell tumors (GCTs).[11] Different phosphorylation sites (i.e. Ser10, Ser28), different antibodies and measurement units (i.e. mitotic index, label index, labeling fraction) were used in these studies in different labs, and there were large variations in the pHH3 levels across studies and cancer types. To our knowledge, this study was the first study to investigate the expression levels of pHH3 across different types of cancers, using uniform techniques and assay platforms in a single laboratory.



## Materials and methods

### Study design

This study was conducted in two Parts. The purpose of Part I was to perform IHC using pHH3 (Ser10) and pHH3 (Ser28) antibodies in formalin-fixed, paraffin-embedded (FFPE) human melanoma, ovarian cancer (10 samples in each cancer type) and differentially treated HeLa cells to evaluate which antibody corresponded to higher expression levels. The purpose of Part II was to perform IHC using the antibody that demonstrated higher expression levels in Part I, in human cancers of breast, colorectal, esophageal, gastric, esophageal, non-small cell lung samples (NSCLC) and head & neck, and (5 in each type). A second evaluation of the percent positive staining of pHH3 (Ser10) and pHH3 (Ser28) in human melanoma and ovarian cancer were performed blindly to assess the levels of pHH3 from two independent readers.

FFPE human cancers were provided by Mosaic Laboratories tissue bank, and were procured under an Institutional Review Board reviewed protocol. Formalin-fixed, paraffin embedded cell blocks were prepared from differentially-treated HeLa cells (ATCC, Manassas, VA) in order to address the IHC assay specificity. HeLa cells were either untreated, treated with nocodazole (0.333  $\mu$ M nocodazole for 18 hours) or treated with double thymidine block (1.65 mM thymidine for 18 hours, 8 hours media, 1.65 mM thymidine for an additional 18 hours) prior to fixation.

pHH3 Ser 10 (rabbit IgG, polyclonal) antibodies were purchased from Upstate (Billerica, CA), and pHH3 Ser 28 (rabbit IgG, Clone E191) were purchased from Epitomics (Burlingame, CA).



## Immunohistochemistry

Immunohistochemistry was performed in accordance with Mosaic Laboratories' validated protocols. Specimens were sectioned at 4 microns thickness, mounted onto positive-charged glass slides, dried, baked, deparaffinized, and rehydrated. Following rehydration, tissue sections were incubated in Envision Peroxidase (Dako, Carpinteria, CA) for 5 minutes to quench endogenous peroxidase. Tissue sections then underwent pretreatment using High Tide Buffer (Mosaic Laboratories, Lake Forest, CA) for 40 minutes in a waterbath set to 95°C followed by a rinse in Splash-T bBuffer (Mosaic Laboratories). Slides were incubated with Sniper (Biocare Medical, Concord, CA) for 5 minutes, which was then tapped off onto an absorbent pad. Slides were incubated with pHH3 (Ser28) antibody or pHH3 (Ser10) diluted in Dako Diluent (Dako) for 30 minutes. Slides were then rinsed in buffer for 5 minutes followed by detection using the Envision+ Rabbit HRP detection reagent (Dako) for 30 minutes. Slides were rinsed with buffer for 5 minutes followed by incubation with DAB (Dako) for either 5 minutes (Ser10) or 10 minutes (Ser28). Slides were rinsed with water, counterstained with Dako hematoxylin, blued in ammonia water, dehydrated through graded alcohols, cleared in xylene, and coverslipped. Enumeration was performed by manual review of approximately 600-1000 cells per image, where possible.

## Data analysis

Tests and descriptive statistics (means and standard deviations) were computed by tumor type. Because the data clearly were not normally distributed, with many low

1  
2  
3 measurements and a few outlying high measurements, nonparametric tests were used for  
4 comparisons resulting in *p*-values. For the analysis of the Part I data, Wilcoxon's  
5 Signed Rank Test was used to compare the pHH3 expression levels as measured by the  
6 two different approaches, tested within both tumor types. The Spearman correlation  
7 (correlation of the ranks) between Ser10 and Ser28 was calculated for the combined  
8 ovarian and melanoma samples. Wilcoxon's Rank Sum Test was used to compare pHH3  
9 levels between tumor types in Part I. For Part II tests, the Kruskal-Wallis test, a  
10 nonparametric alternative to ANOVA (analysis of variance) was used to compare the  
11 pHH3 levels between different types of cancers.  
12  
13  
14  
15  
16  
17  
18  
19  
20  
21  
22  
23

24 For variability assessment between two evaluators, a variance components  
25 analysis of log (% Ser10) and log (% Ser28) data was conducted. The mixed model  
26 included an intercept term, a fixed effect for reviewer, a random effect for the particular  
27 stained sample that was repeatedly measured, and a random residual error term. The  
28 latter two terms allow us to decompose the overall variance as a sum of variance from  
29 sample-to-sample and variance due to repeated review of the sample.  
30  
31  
32  
33  
34  
35  
36  
37  
38  
39  
40  
41  
42  
43  
44  
45  
46  
47  
48  
49  
50  
51  
52  
53  
54  
55  
56  
57  
58  
59  
60

## Results

Demographic, clinical, and pHH3 staining information on different types of cancer were summarized in Table 1. IHC staining of two ovarian cancer samples is shown for each antibody in Figure 1. In Part I melanoma samples, the percentage of cells that were pHH3 (Ser10)-positive was statistically significantly higher than pHH3 (Ser28) ( $p=0.0039$ ), with mean pHH3 of 1.28% (SD, 0.47; range 0.73-2.13) for Ser10 and 0.53% (SD, 0.44; range 0.14-1.69) for Ser28. In Part I ovarian cancer samples, mean pHH3 was also significantly higher for Ser10 than Ser28 ( $p=0.0020$ ) with a mean of 3.47% (SD, 3.51; range 0.60-11.70) for Ser10 and 0.62% (SD, 0.68; range 0-2.30) for Ser28. The Spearman correlation of Ser10 with Ser28 ( $N=20$ , using both tumor types) was positive 0.30 but not statistically significant ( $p=0.1966$ ), indicating that these two measures do not track each other within a sample in a robust fashion. Comparing pHH3 levels between ovarian and melanoma tumor samples, there was some evidence of a significant difference as measured by Ser10 ( $p=0.0638$ ), but not Ser28 ( $p=1.000$ ). Based on the above results, Ser10 was selected as the antibody for assaying pHH3 in Part II.

In Part II, mean pHH3 Ser10 expression was highest in colorectal cancer (3.73%, SD 2.45%), followed by head & neck cancer (3.00%, SD 2.33%), gastric cancer (2.74%, SD 1.62%), esophageal cancer (2.36%, SD 1.08%), breast cancer (1.80%, SD 0.35%), NSCLC (1.42%, SD 0.88%). The differences in these six tumor types assessed in Part II were not found to be statistically significant at these limited group sizes via nonparametric testing ( $p=0.1969$ ).

IHC staining results for the differentially cultured HeLa cells are listed in Table 2 and images are presented in Figure 2. Staining was less frequent with the pHH3 (Ser28)

1  
2  
3 assay than the pHH3 (Ser10) in untreated (0.5% vs. 4.75%) and nocodazole-treated  
4  
5 (30.10% vs. 51.16%) HeLa cells, although similar in thymidine-treated HeLa cells  
6  
7 (1.78% vs. 1.91%). In HeLa cells stained with both pHH3 IHC assays, the staining  
8  
9 intensity of positive cells was similar between Ser10 and Ser28 pHH3 IHC assays.  
10  
11

12  
13 Manual enumeration performed by two independent reviewers of the percent  
14  
15 positive staining observed in melanoma and ovarian cancer samples is summarized in  
16  
17 Table 3. The percent positive staining was performed on approximately 1000 tumor cells  
18  
19 per image, which was consistent for each reviewer.  
20  
21

22  
23 No significant difference was found between results generated by independent  
24  
25 reviewers. Table 3 provides results for breakdown of the overall variance. With the  
26  
27 exception of Ser10 in Melanoma, results indicate the variability from sample-to-sample is  
28  
29 the dominant source of variation, and that multiple reviews of the same stained sample is  
30  
31 a relatively minor component of the overall variability.  
32  
33  
34  
35  
36  
37  
38  
39  
40  
41  
42  
43  
44  
45  
46  
47  
48  
49  
50  
51  
52  
53  
54  
55  
56  
57  
58  
59  
60

## Discussion

Measurement of pHH3 levels can be used for quantifying mitosis and the effectiveness of mitotic inhibitors in early drug development. A number of previous studies have measured pHH3 levels among different types of cancers. Studies suggested that pHH3 index increased with higher grade of tumor, including cancers of breast, ovarian, melanoma, vulval intraepithelial neoplasia, and meningioma, and limited studies suggested no difference between different grades of tumor for colorectal cancer or squamous cell carcinoma of the larynx.[1-7, 10] The strong correlation between pHH3 (Ser10) and mitotic index has been confirmed in multiple studies [1-3], and the detection of mitotic figures via pHH3 (Ser10) IHC analysis has been described as having superior sensitivity due to enhanced detection of prophase cells and better specificity due to lack of staining in apoptotic cells. The pHH3 levels have been shown to be a prognostic factor for different types of cancers. At the time this study was performed, there were no data comparing pHH3 levels between Ser10 and Ser28 and pHH3 levels across different types of cancers.

Using uniformed techniques, and assay platforms in a single laboratory, we assessed pHH3 (Ser 10 and Ser 28) expression levels. Our results suggested that these two antibodies do not correlate to each other within a sample in a robust fashion, and pHH3 values measured using Ser10 were significantly higher than those obtained via Ser28. The results were confirmed by a second, independent reviewer of the slides.

A greater fraction of cells stained for pHH3 (Ser10) than pHH3 (Ser28) in untreated (4.75% and 0.5%, respectively) and nocodazole-treated HeLa cells (51.16% and 30.10%, respectively), although results were similar in thymidine-treated cells.

1  
2  
3 Nocodazole arrests cells in M phase, so the increase in staining frequency is consistent  
4  
5 with expectations of specificity for mitotic cells. In HeLa cells stained with both pHH3  
6  
7 IHC assays, the staining intensity of positive cells was similar between Ser10 and Ser28  
8  
9 pHH3 IHC assays. There are at least four possibilities for the divergent results. The first  
10  
11 is that the phosphorylation sites are differentially regulated, and that not all mitotic cells  
12  
13 will demonstrate pHH3 at both sites. The second possibility is that Ser10 is  
14  
15 phosphorylated earlier or for a more prolonged period during mitosis than Ser28. Third,  
16  
17 the pHH3 (Ser28) has been described as sensitive to delays in time to fixation;<sup>[12]</sup>  
18  
19 however samples used for this study were controlled for fixation. Finally, the differences  
20  
21 may be simply due to intrinsic antibody characteristics such as affinity and/or specificity.  
22  
23 To address whether the decreased proportion of cells stained by pHH3 (Ser28) was  
24  
25 because of inadequate sensitivity, we attempted to increase the sensitivity in specimens  
26  
27 with divergent staining results. Increasing the pHH3 (Ser28) primary antibody  
28  
29 concentration did not result in an increase in positive cells prior to appearance of non-  
30  
31 specific staining (data not shown). This result supports the observation that  
32  
33 phosphorylation of Ser28 is present only in a fraction of cells with Ser10  
34  
35 phosphorylation.

36  
37  
38  
39  
40  
41  
42  
43 In Part II, no significant difference was observed among different tumor types  
44  
45 ( $p=0.1969$  non-parametric testing), which may probably be due to the sample size ( $n=5$   
46  
47 for each). In addition, we could not perform subgroup analysis and check the variation of  
48  
49 pHH3 levels by different demographic, pathology, and clinical characteristics. Further  
50  
51 studies with larger sample sizes are needed to confirm the preliminary findings.  
52  
53  
54  
55  
56  
57  
58  
59  
60

1  
2  
3 In conclusion, mitotic counts performed by evaluating cells that are positive by  
4 immunohistochemistry for pHH3 at Ser10 were much higher than at Ser28, and pHH3  
5  
6 (Ser10) should be used for evaluating the effectiveness of mitotic inhibitors.  
7  
8  
9

### 10 11 12 13 **Acknowledgements**

14  
15 Authors would like to thank Ms. Sheila Erespe and Ms. Kim Della Penna of Merck for  
16  
17 their valuable help in preparing this manuscript.  
18  
19

20  
21  
22 **Competing interests and Source of Funding:** AS, WZ, JL, and PS are employees of  
23  
24 Merck Sharp & Dohme Corp. and may own stock/stock options at Merck. LD and CK are  
25  
26 employees of and shareholders in Mosaic Laboratories, which received a fee for work  
27  
28 done from Merck.  
29  
30  
31

### 32 33 34 **Article Focus**

- 35  
36 • Immunohistochemical detection of phosphorylated histone H3 (pHH3) is often  
37  
38 implemented for monitoring drug-mediated mitotic changes in clinical trials; however,  
39  
40 data on the expression level among different cancers is limited.  
41  
42  
43 • By comparing the performance of antibodies to pHH3 (Ser10) and pHH3 (Ser28) in the  
44  
45 same laboratory and in various cancer specimens, the pHH3 Ser10 was shown to be  
46  
47 significantly higher than Ser28 and may serve as the more robust of two pHH3 assays for  
48  
49 measuring mitotic index.  
50  
51  
52  
53  
54  
55  
56  
57  
58  
59  
60

### Key messages

- H3 (pHH3) is often implemented for monitoring drug-mediated mitotic changes in clinical trials; however, data on the expression level among different cancers are limited.
- We, for the first time, compared in the same laboratory the performance of two antibodies pHH3 (Ser10) and pHH3 (Ser28), in various cancer specimen.
- The pHH3 Ser10 was significantly higher than Ser28 and may serve as the more robust of two pHH3 assays for measuring mitotic index.

### Strengths and limitations of the study

**Strengths:** At the time this study was performed, there were no data comparing pHH3 levels between Ser10 and Ser28 and pHH3 levels across different types of cancers. Using uniformed techniques, and assay platforms in a single laboratory, we assessed pHH3 (Ser 10 and Ser 28) expression levels.

**Limitations:** No significant difference was observed among different tumor types ( $p=0.1969$  non-parametric testing), which may probably be due to the sample size ( $n=5$  for each). In addition, we could not perform subgroup analysis and check the variation of pHH3 levels by different demographic, pathology, and clinical characteristics. Further studies with larger sample sizes are needed to confirm the preliminary findings.



**Table 1** The pHH3 expression levels among different types of cancers.

| Tumor type | Sample size | Age (mean, SD) | Gender (male: female)   | Prior Therapy           | Stage                                | Grade                                | pHH3 (Ser10) percent positive* | pHH3 (Ser 28) percent positive* |
|------------|-------------|----------------|-------------------------|-------------------------|--------------------------------------|--------------------------------------|--------------------------------|---------------------------------|
| Melanoma   | 10          | 58.5 (14.1)    | M = 3<br>F = 7          | Y = 5<br>N = 4<br>U = 1 | II = 1<br>III = 6<br>IV = 1<br>U = 2 | G1 = 0<br>G2 = 0<br>G3 = 0<br>U = 10 | 1.28 (0.47);<br>0.73-<br>2.13  | 0.53 (0.44);<br>0.14-<br>1.69   |
| Ovarian    | 10          | 61.7 (7.3)     | M = 0<br>F = 10         | Y = 1<br>N = 0<br>U = 9 | II = 0<br>III = 4<br>IV = 2<br>U = 4 | G1 = 0<br>G2 = 1<br>G3 = 6<br>U = 3  | 3.47 (3.51);<br>0.60-<br>11.70 | 0.62 (0.68);<br>0.00-<br>2.30   |
| Colorectal | 5           | 60.4 (13.5)    | M = 3<br>F = 1<br>U = 1 | Y = 2<br>N = 0<br>U = 3 | II = 1<br>III = 0<br>IV = 4<br>U = 0 | G1 = 0<br>G2 = 1<br>G3 = 0<br>U = 4  | 3.73 (2.45)                    |                                 |
| Head/neck  | 5           | 55.4 (9.8)     | M = 5<br>F = 0          | Y = 0<br>N = 3<br>U = 2 | II = 0<br>III = 1<br>IV = 0<br>U = 4 | G1 = 0<br>G2 = 2<br>G3 = 1<br>U = 2  | 3.00 (2.33)                    |                                 |
| Gastric    | 5           | 61.6 (20.9)    | M = 4<br>F = 1          | Y = 2<br>N = 0<br>U = 3 | II = 0<br>III = 2<br>IV = 3<br>U = 0 | G1 = 0<br>G2 = 2<br>G3 = 3<br>U = 0  | 2.74 (1.62)                    |                                 |
| Esophageal | 5           | 63.6 (11.4)    | M = 4<br>F = 1          | Y = 1<br>N = 2<br>U = 2 | II = 1<br>III = 1<br>U = 2           | G1 = 1<br>G2 =                       | 2.36 (1.08)                    |                                 |

|        |   |                |                |                         |                                      |                                     |                |  |
|--------|---|----------------|----------------|-------------------------|--------------------------------------|-------------------------------------|----------------|--|
|        |   |                |                |                         | IV = 0<br>U = 2                      | 1<br>G3 = 0<br>U = 3                |                |  |
| Breast | 5 | 61.6<br>(20.6) | M = 0<br>F = 5 | Y = 1<br>N = 0<br>U = 4 | II = 0<br>III = 3<br>IV = 1<br>U = 1 | G1 = 0<br>G2 = 1<br>G3 = 4<br>U = 0 | 1.80<br>(0.35) |  |
| NSCLC  | 5 | 62.2<br>(8.2)  | M = 5<br>F = 0 | Y = 4<br>N = 1<br>U = 0 | II = 0<br>III = 0<br>IV = 1<br>U = 3 | G1 = 0<br>G2 = 0<br>G3 = 0<br>U = 5 | 1.42<br>(0.88) |  |

\* Data are presented as mean (SD), and range

1  
2  
3  
4  
5  
6  
7  
8  
9  
10  
11  
12  
13  
14  
15  
16  
17  
18  
19  
20  
21  
22  
23  
24  
25  
26  
27  
28  
29  
30  
31  
32  
33  
34  
35  
36  
37  
38  
39  
40  
41  
42  
43  
44  
45  
46  
47  
48  
49  
50  
51  
52  
53  
54  
55  
56  
57  
58  
59  
60

1  
2  
3  
4  
5  
6  
7  
8  
9  
10  
11  
12  
13  
14  
15  
16  
17  
18  
19  
20  
21  
22  
23  
24  
25  
26  
27  
28  
29  
30  
31  
32  
33  
34  
35  
36  
37  
38  
39  
40  
41  
42  
43  
44  
45  
46  
47  
48  
49  
50  
51  
52  
53  
54  
55  
56  
57  
58  
59  
60

**Table 2** pHH3 expression levels in differentially-treated HeLa cells.

|                  | pHH3<br>Ser10<br>% Positive | pHH3<br>Ser28<br>% Positive |
|------------------|-----------------------------|-----------------------------|
| HeLa, Untreated  | 4.75%                       | 0.50%                       |
| HeLa, Nocodazole | 51.16%                      | 30.10%                      |
| HeLa, Thymidine  | 1.91%                       | 1.78%                       |

For peer review only

**Table 3** Variance components for log percent positive staining for pHH3 (Ser10) and pHH3 (Ser28) in human melanoma and ovarian cancer.

| Tumor Type | Assay Type | Total Variability | Sample-to-Sample | Review-to-Review | % Total due to Review |
|------------|------------|-------------------|------------------|------------------|-----------------------|
| Melanoma   | Ser10      | 0.1156            | 0.0567           | 0.0589           | 51.0%                 |
|            | Ser28      | 0.5444            | 0.4909           | 0.0535           | 9.8%                  |
| Ovarian    | Ser10      | 0.7362            | 0.7243           | 0.0119           | 1.6%                  |
|            | Ser28      | 0.8597            | 0.8144           | 0.0453           | 5.3%                  |

## References

1. Bossard C, Jarry A, Colombeix C, et al. Phosphohistone H3 labelling for histoprognostic grading of breast adenocarcinomas and computer-assisted determination of mitotic index. *J Clin Pathol* 2006; 59: 706-710
2. Ribalta T, McCutcheon IE, Aldape KD, et al. The mitosis-specific antibody anti-phosphohistone-H3 (PHH3) facilitates rapid reliable grading of meningiomas according to WHO 2000 criteria. *Am J Surg Pathol* 2004; 28: 1532-1536
3. Skaland I, Janssen EA, Gudlaugsson E, et al. Phosphohistone H3 expression has much stronger prognostic value than classical prognosticators in invasive lymph node-negative breast cancer patients less than 55 years of age. *Mod Pathol* 2007; 20: 1307-1315
4. Skaland I, Janssen EA, Gudlaugsson E, et al. Validating the prognostic value of proliferation measured by Phosphohistone H3 (PPH3) in invasive lymph node-negative breast cancer patients less than 71 years of age. *Breast Cancer Res Treat* 2008; 114: 39-45
5. Scott IS, Heath TM, Morris LS, et al. A novel immunohistochemical method for estimating cell cycle Part distribution in ovarian serous neoplasms: implications for the histopathological assessment of paraffin-embedded specimens. *Br J Cancer* 2004; 90: 1583-1590

- 1  
2  
3  
4  
5  
6  
7  
8  
9  
10  
11  
12  
13  
14  
15  
16  
17  
18  
19  
20  
21  
22  
23  
24  
25  
26  
27  
28  
29  
30  
31  
32  
33  
34  
35  
36  
37  
38  
39  
40  
41  
42  
43  
44  
45  
46  
47  
48  
49  
50  
51  
52  
53  
54  
55  
56  
57  
58  
59  
60  
6. Scott IS, Morris LS, Bird K, et al. A novel immunohistochemical method to estimate cell-cycle Part distribution in archival tissue: implications for the prediction of outcome in colorectal cancer. *J Pathol* 2003; 201: 187-197
7. Chatrath P, Scott IS, Morris LS, et al. Immunohistochemical estimation of cell cycle Part in laryngeal neoplasia. *Br J Cancer* 2006; 95: 314-321
8. Scott IS, Morris LS, Rushbrook SM, et al. Immunohistochemical estimation of cell cycle entry and Part distribution in astrocytomas: applications in diagnostic neuropathology. *Neuropathol Appl Neurobiol* 2005; 31: 455-466
9. Colman H, Giannini C, Huang L, et al. Assessment and prognostic significance of mitotic index using the mitosis marker phospho-histone H3 in low and intermediate-grade infiltrating astrocytomas. *Am J Surg Pathol* 2006; 30: 657-664
10. Kim YJ, Ketter R, Steudel WI, et al. Prognostic significance of the mitotic index using the mitosis marker anti-phosphohistone H3 in meningiomas. *Am J Clin Pathol* 2007; 128: 118-125
11. Kapur P, Rakheja D, Balani JP, et al. Phosphorylated histone H3, Ki-67, p21, fatty acid synthase, and cleaved caspase-3 expression in benign and atypical granular cell tumors. *Arch Pathol Lab Med* 2007; 131: 57-64
12. Hirata A, Inada K, Tsukamoto T, et al. Characterization of a monoclonal antibody, HTA28, recognizing a histone H3 phosphorylation site as a useful marker of M-Part cells. *J Histochem Cytochem* 2004; 52:1503-1509

1  
2 **Figure Legend**  
3  
4  
5

6 **Figure 1** Photomicrographs of ovarian cancer samples stained with the validated IHC protocol for pHH3  
7 (Ser10) or pHH3 (Ser28). Scale bar = 50  $\mu$ m  
8

9  
10 Figure 1a\_Ser 10 ML0701077 Ovarian 20x

11  
12 Figure 1b\_Ser10 ML0705045A Ovarian 20x

13  
14 Figure 1c\_Ser 28 ML0701077 Ovarian 20x

15  
16 Figure 1d\_Ser 28 ML0705045A Ovarian 20x  
17  
18  
19  
20  
21  
22

23 **Figure 2** Photomicrographs (20X) of the HeLa cell line stained with the validated IHC protocol for  
24 pHH3 (Ser10) or pHH3 (Ser28).  
25  
26  
27  
28  
29  
30  
31  
32  
33  
34  
35  
36  
37  
38  
39  
40  
41  
42  
43  
44  
45  
46  
47  
48  
49  
50  
51  
52  
53  
54  
55  
56  
57  
58  
59  
60

1  
2  
3  
4  
5  
6  
7  
8  
9  
10  
11  
12  
13  
14  
15  
16  
17  
18  
19  
20  
21  
22  
23  
24  
25  
26  
27  
28  
29  
30  
31  
32  
33  
34  
35  
36  
37  
38  
39  
40  
41  
42  
43  
44  
45  
46  
47  
48  
49  
50  
51  
52  
53  
54  
55  
56  
57  
58  
59  
60

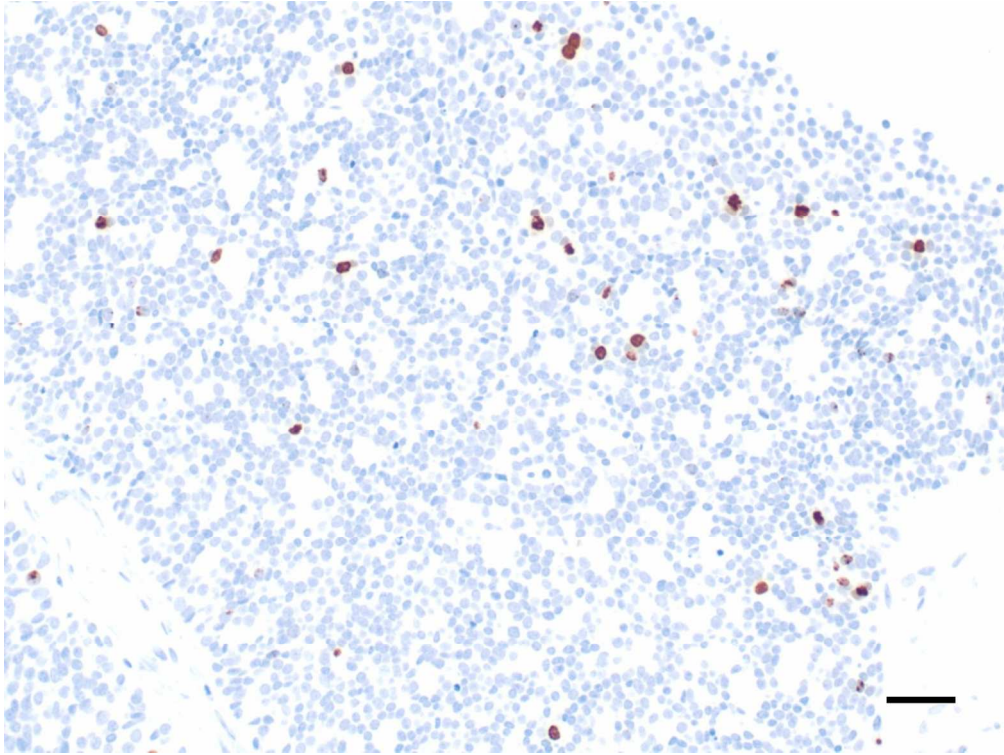

423x317mm (96 x 96 DPI)

ew only



1  
2  
3  
4  
5  
6  
7  
8  
9  
10  
11  
12  
13  
14  
15  
16  
17  
18  
19  
20  
21  
22  
23  
24  
25  
26  
27  
28  
29  
30  
31  
32  
33  
34  
35  
36  
37  
38  
39  
40  
41  
42  
43  
44  
45  
46  
47  
48  
49  
50  
51  
52  
53  
54  
55  
56  
57  
58  
59  
60

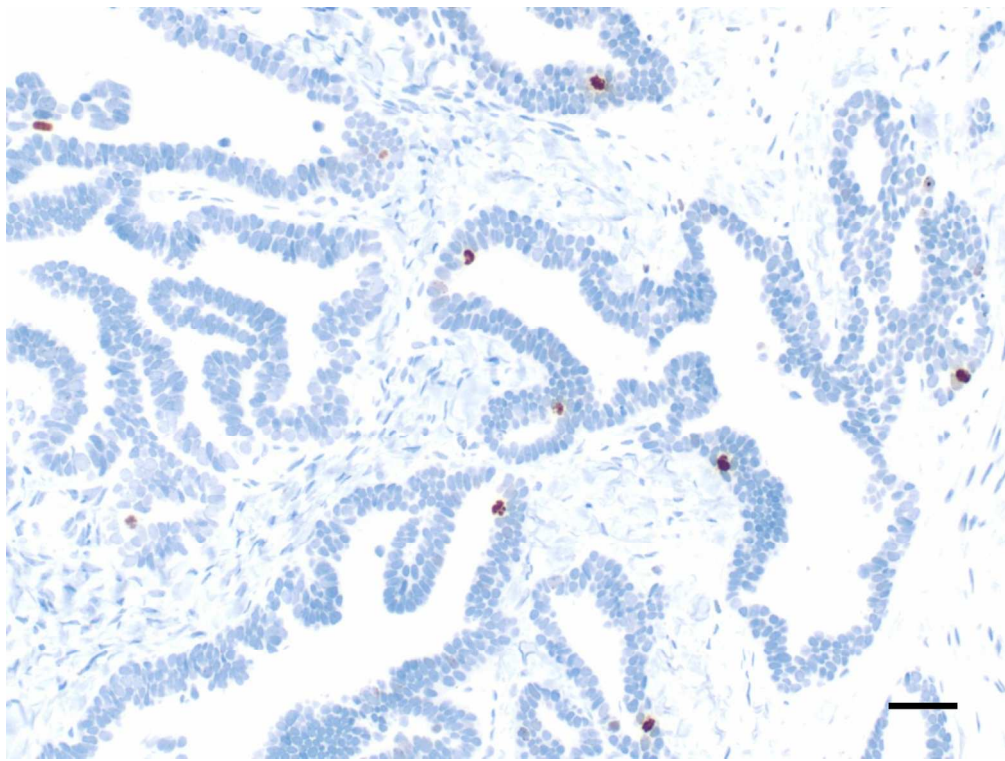

423x317mm (96 x 96 DPI)

Review only

1  
2  
3  
4  
5  
6  
7  
8  
9  
10  
11  
12  
13  
14  
15  
16  
17  
18  
19  
20  
21  
22  
23  
24  
25  
26  
27  
28  
29  
30  
31  
32  
33  
34  
35  
36  
37  
38  
39  
40  
41  
42  
43  
44  
45  
46  
47  
48  
49  
50  
51  
52  
53  
54  
55  
56  
57  
58  
59  
60

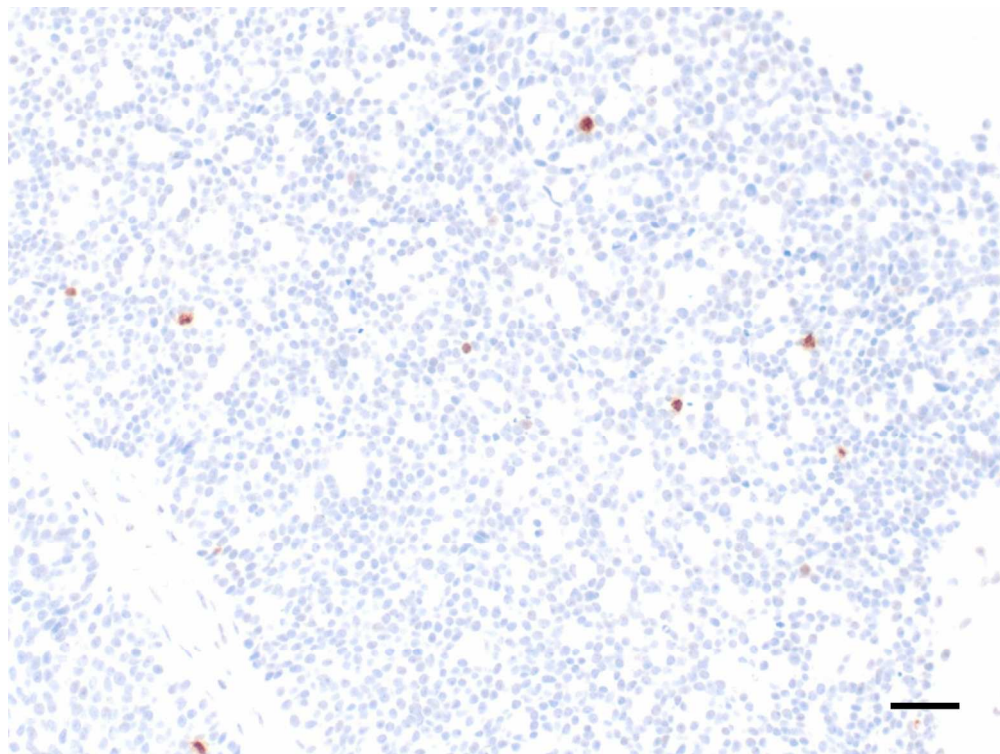

423x317mm (96 x 96 DPI)

Review only

1  
2  
3  
4  
5  
6  
7  
8  
9  
10  
11  
12  
13  
14  
15  
16  
17  
18  
19  
20  
21  
22  
23  
24  
25  
26  
27  
28  
29  
30  
31  
32  
33  
34  
35  
36  
37  
38  
39  
40  
41  
42  
43  
44  
45  
46  
47  
48  
49  
50  
51  
52  
53  
54  
55  
56  
57  
58  
59  
60

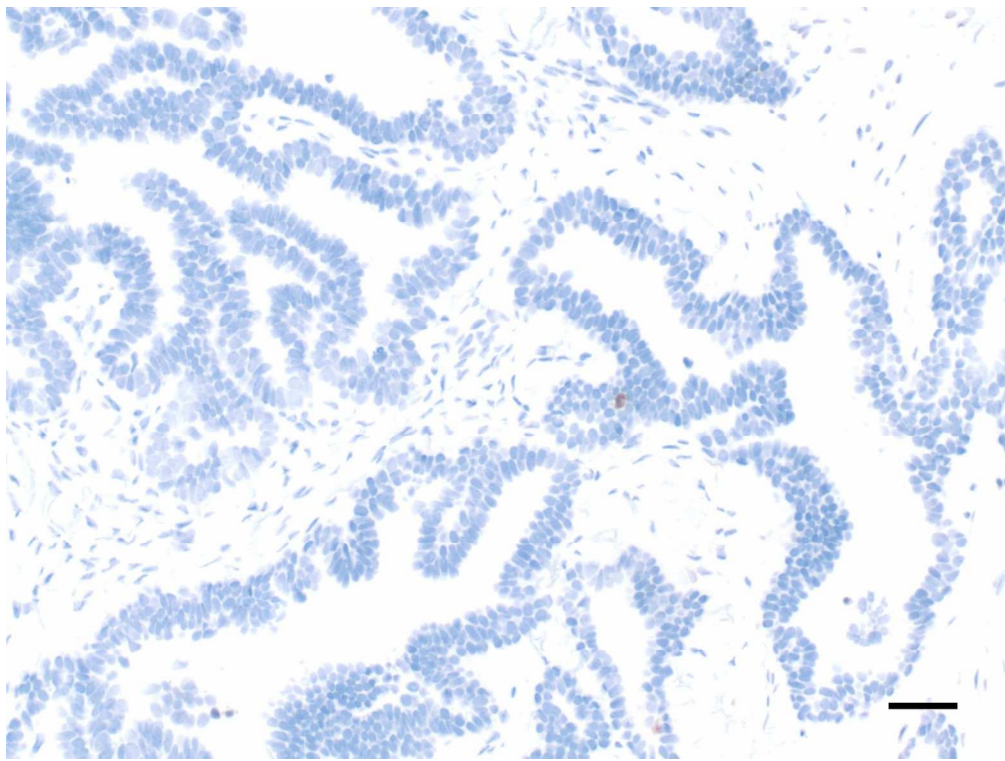

423x317mm (96 x 96 DPI)

Review only

Figure 1 Photomicrographs of ovarian cancer samples stained with the validated IHC protocol for pHH3 (Ser10) or pHH3 (Ser28). Scale bar = 50  $\mu$ m

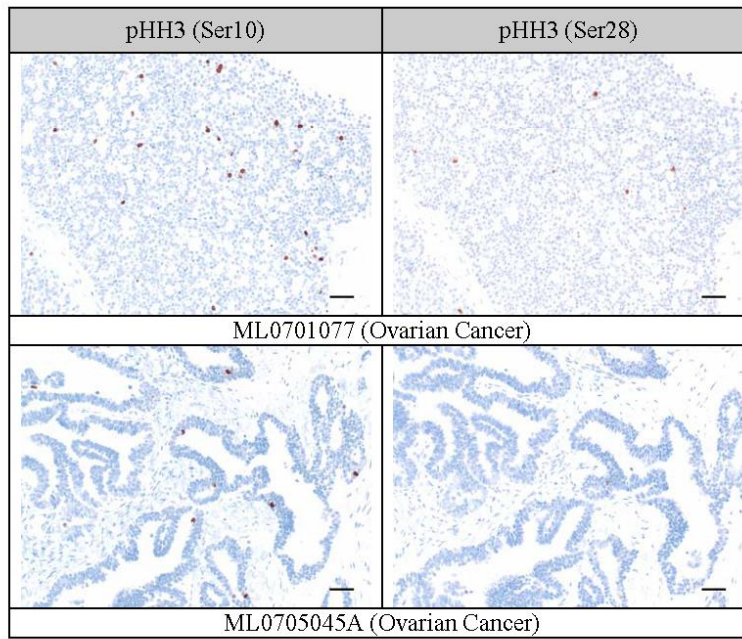



1  
2  
3  
4  
5  
6  
7  
8  
9  
10  
11  
12  
13  
14  
15  
16  
17  
18  
19  
20  
21  
22  
23  
24  
25  
26  
27  
28  
29  
30  
31  
32  
33  
34  
35  
36  
37  
38  
39  
40  
41  
42  
43  
44  
45  
46  
47  
48  
49  
50  
51  
52  
53  
54  
55  
56  
57  
58  
59  
60

**Figure 2** Photomicrographs (20X) of the HeLa cell line stained with the validated IHC protocol for pHH3 (Ser10) or pHH3 (Ser28).

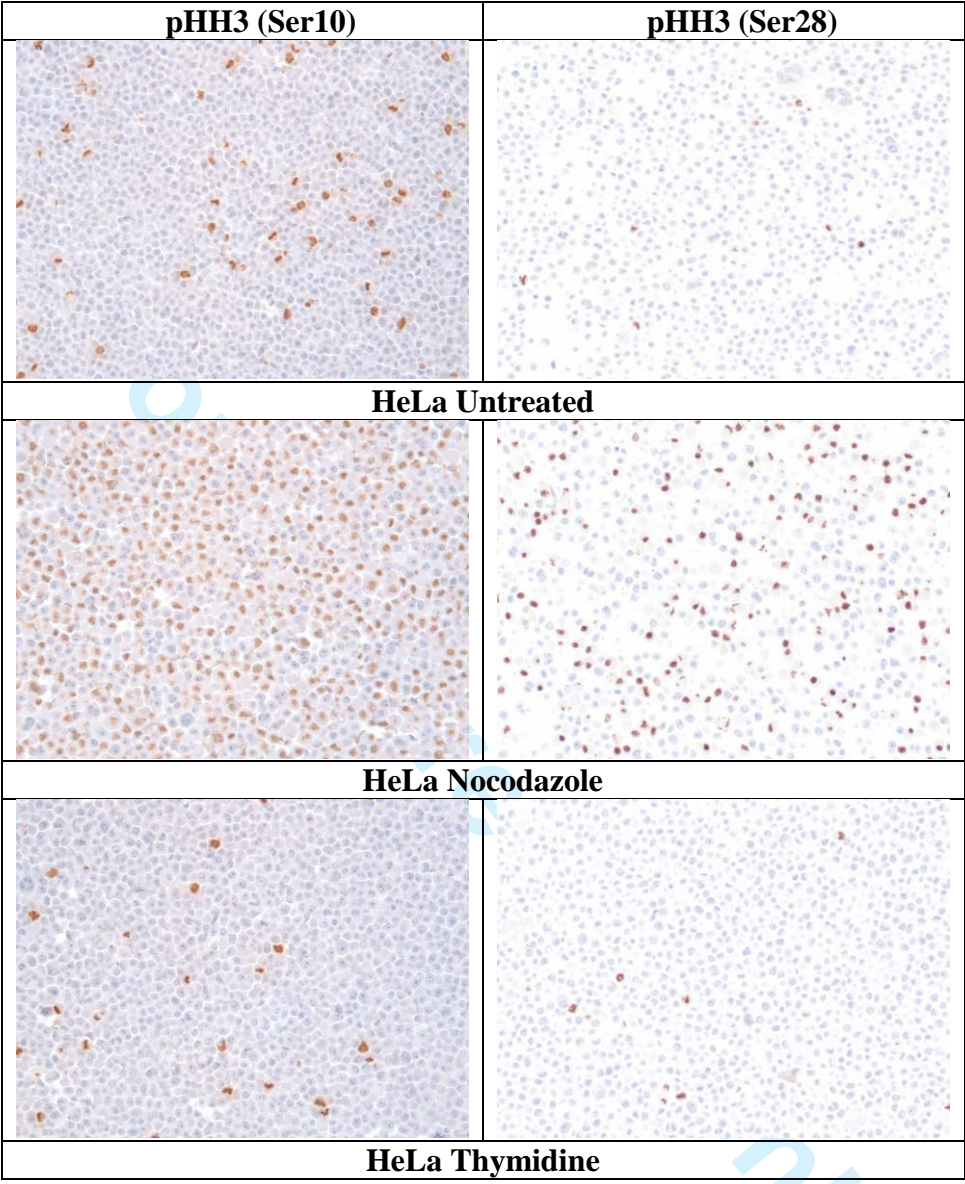

Supplement: bmjopen-2012-001071.draft_revisions.pdf [file bmjopen-2012-001071.draft_revisions.pdf]
